# Supplementary material for: Tracing the origin and evolution history of methylation-related genes in plants
Source: PubMed Central journal article supplement (PMC6624907; doi:10.1186/s12870-019-1923-7), 2019-07-12

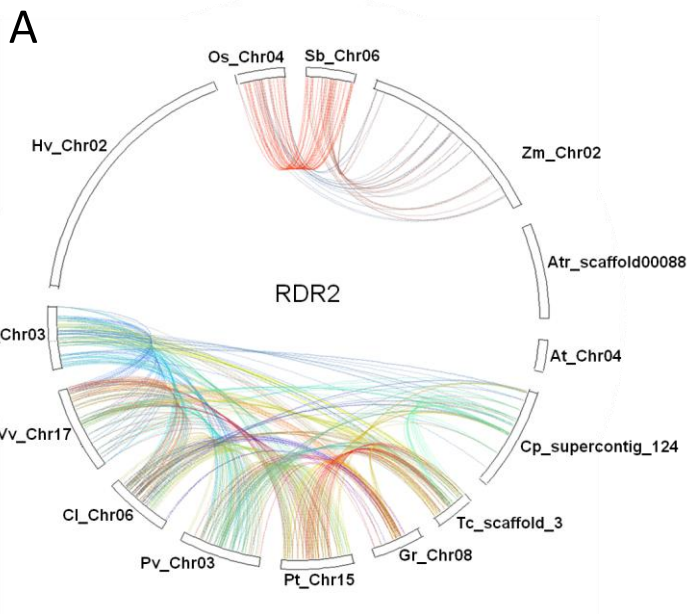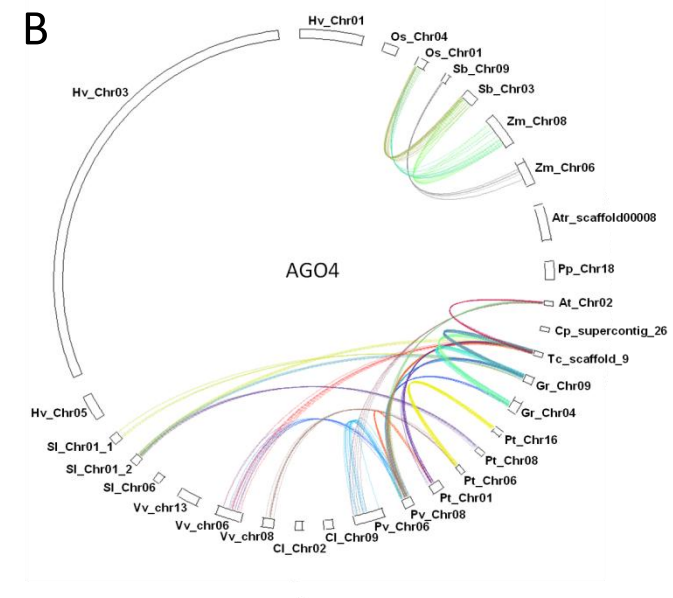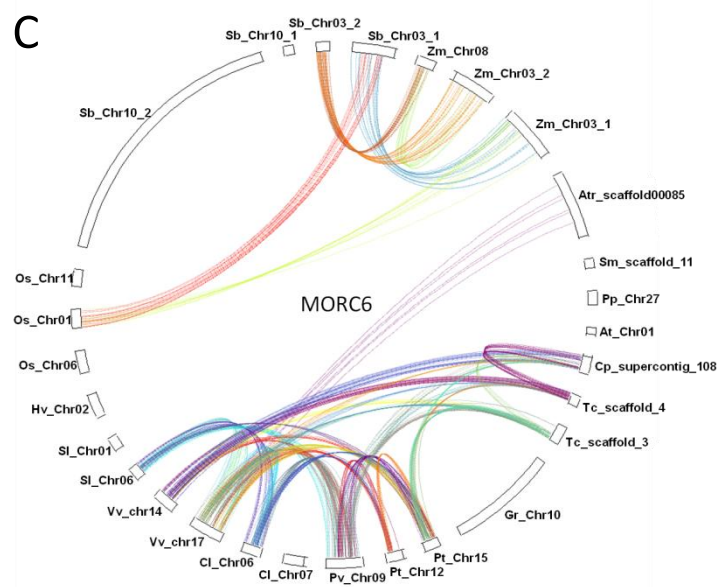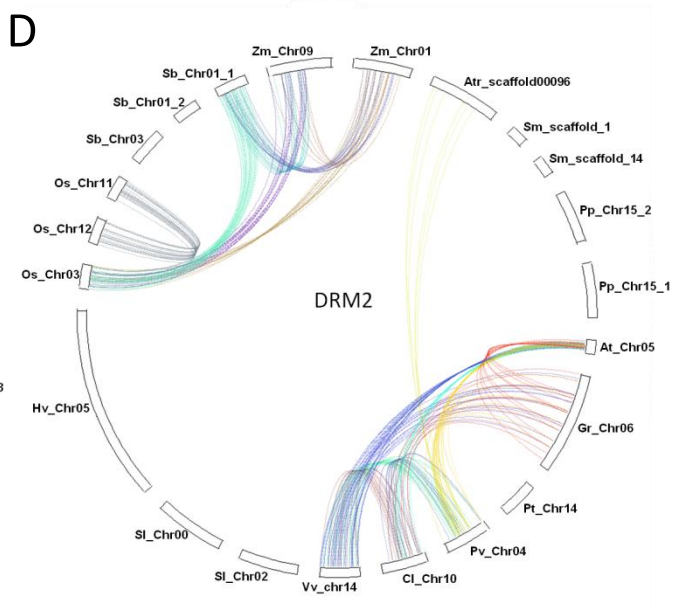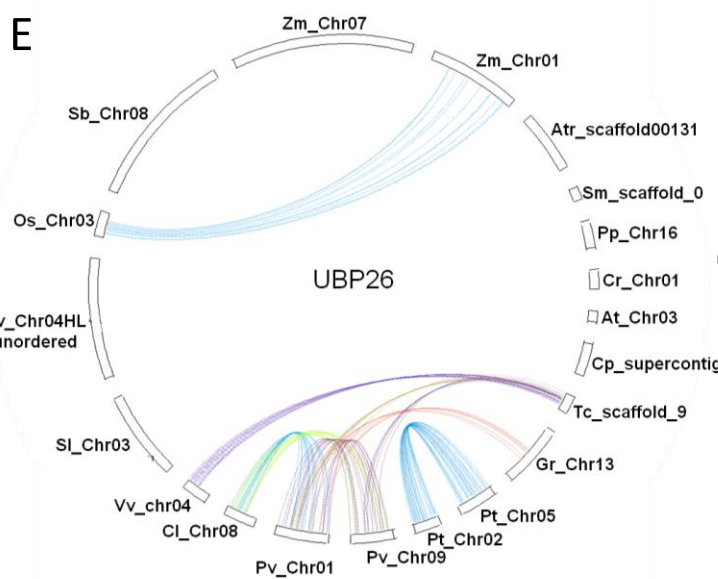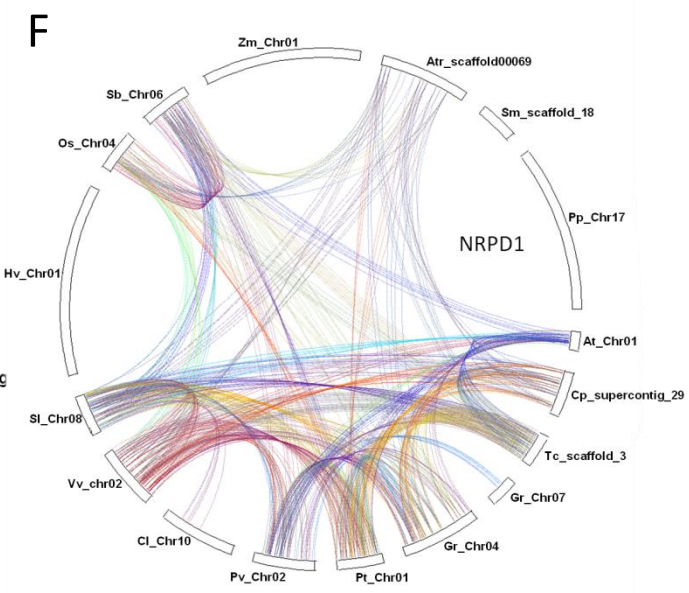

**G**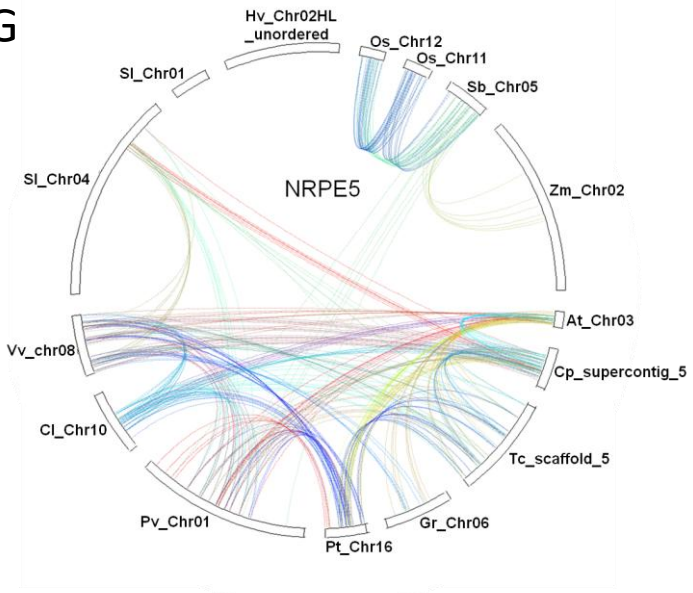**H**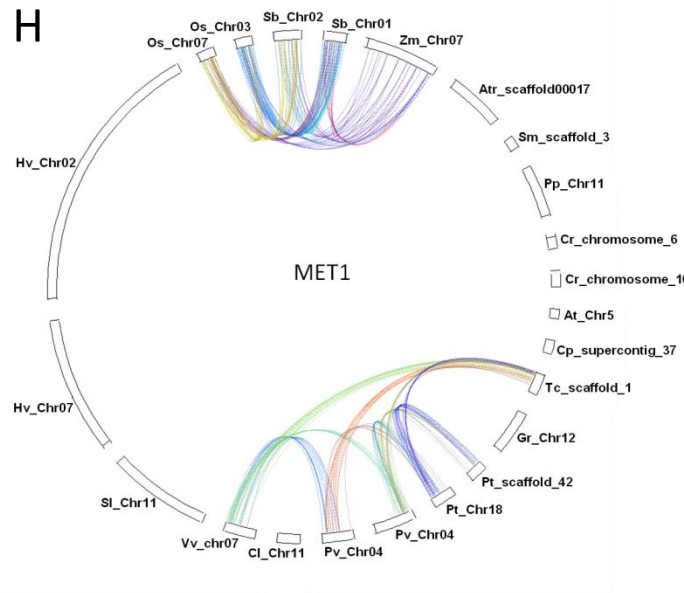

Supplement: 12870_2019_1923_MOESM1_ESM.pdf [file 12870_2019_1923_MOESM1_ESM.pdf]
