# Supplementary material for: Tracing the origin and evolution history of methylation-related genes in plants
Source: PubMed Central journal article supplement (PMC6624907; doi:10.1186/s12870-019-1923-7), 2019-07-12
Supplement: 12870_2019_1923_MOESM2_ESM.pdf [file 12870_2019_1923_MOESM2_ESM.pdf]

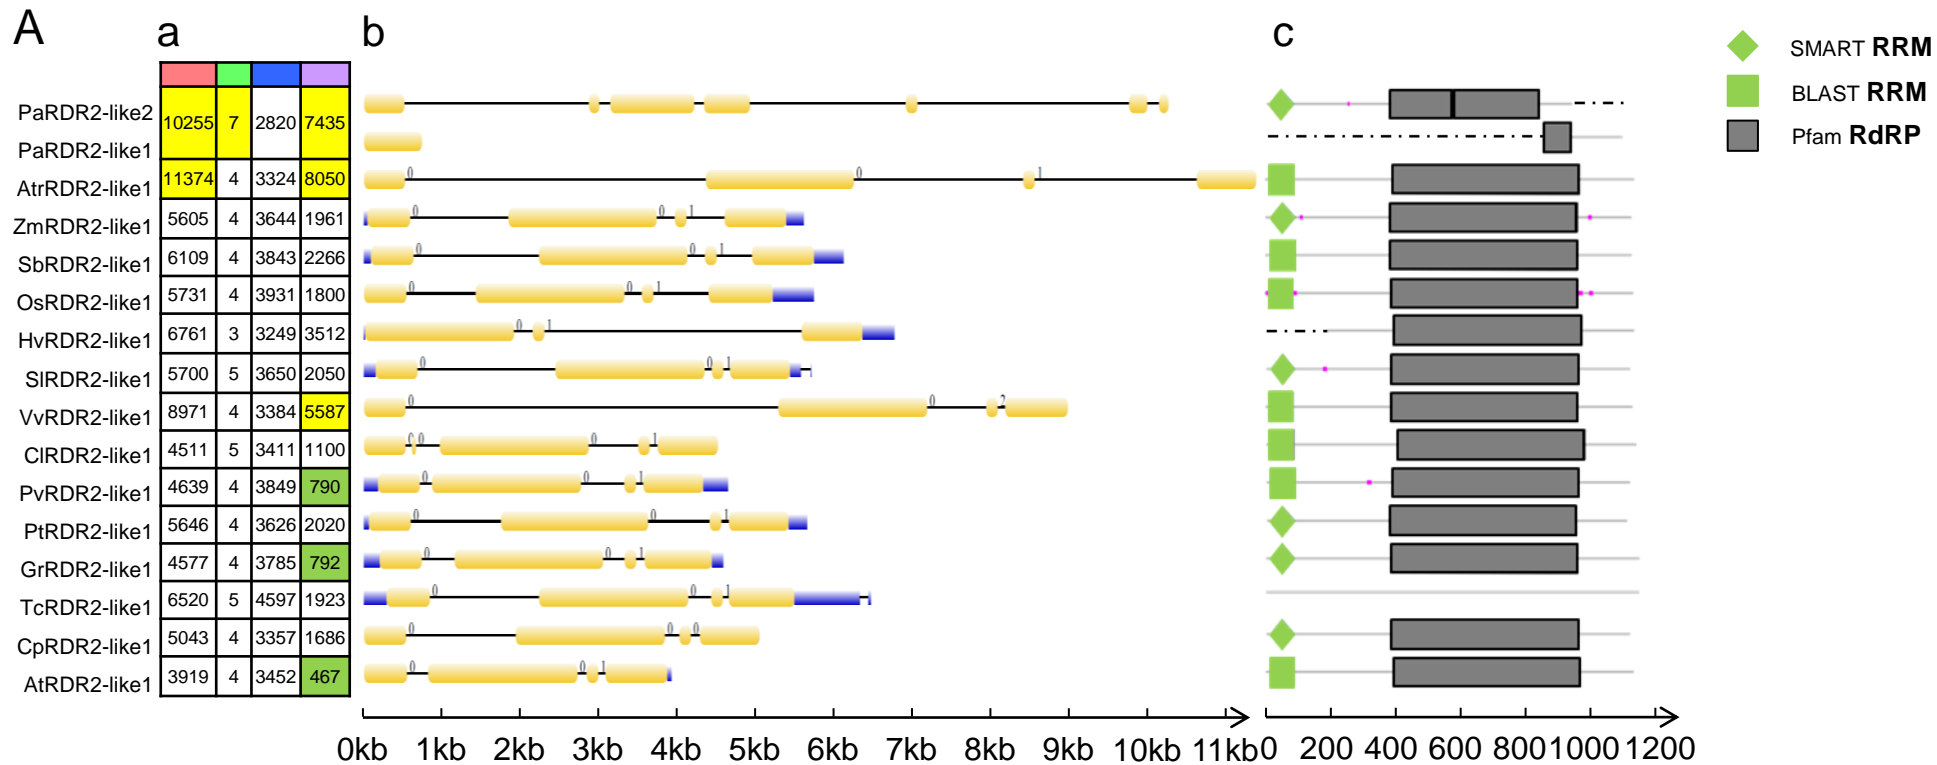

**Legend:**

Color at the top of the table in a: ■ Gene length ■ Exon number ■ Exon length ■ Intron length

Color in exons-introns structures in b: ■ CDS ■ UTR — Intron 0 1 2: intron phase

Color in the domain structures in c: ■ Low complexity region ■ Coiled coil regions ■ Signal peptides ■ Transmembrane segments

B

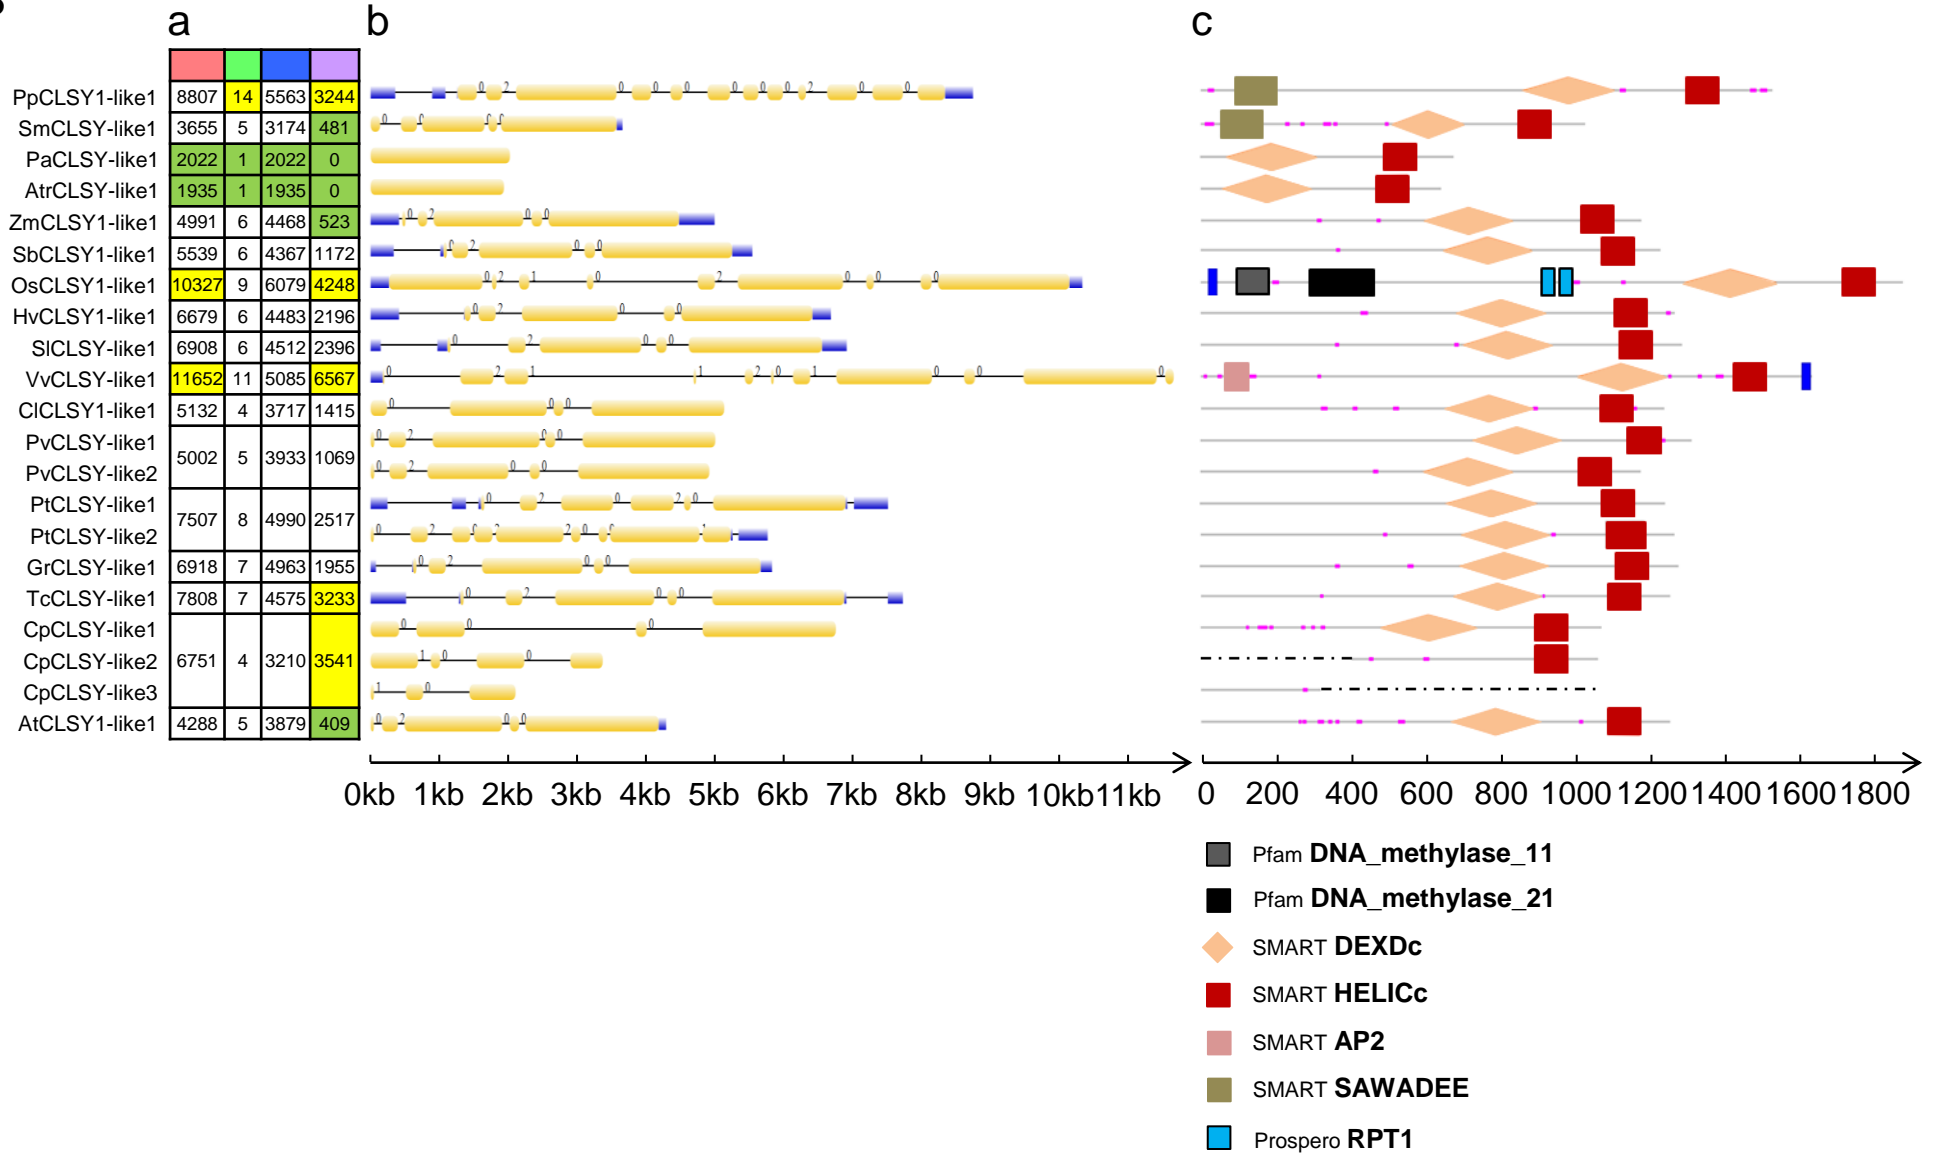

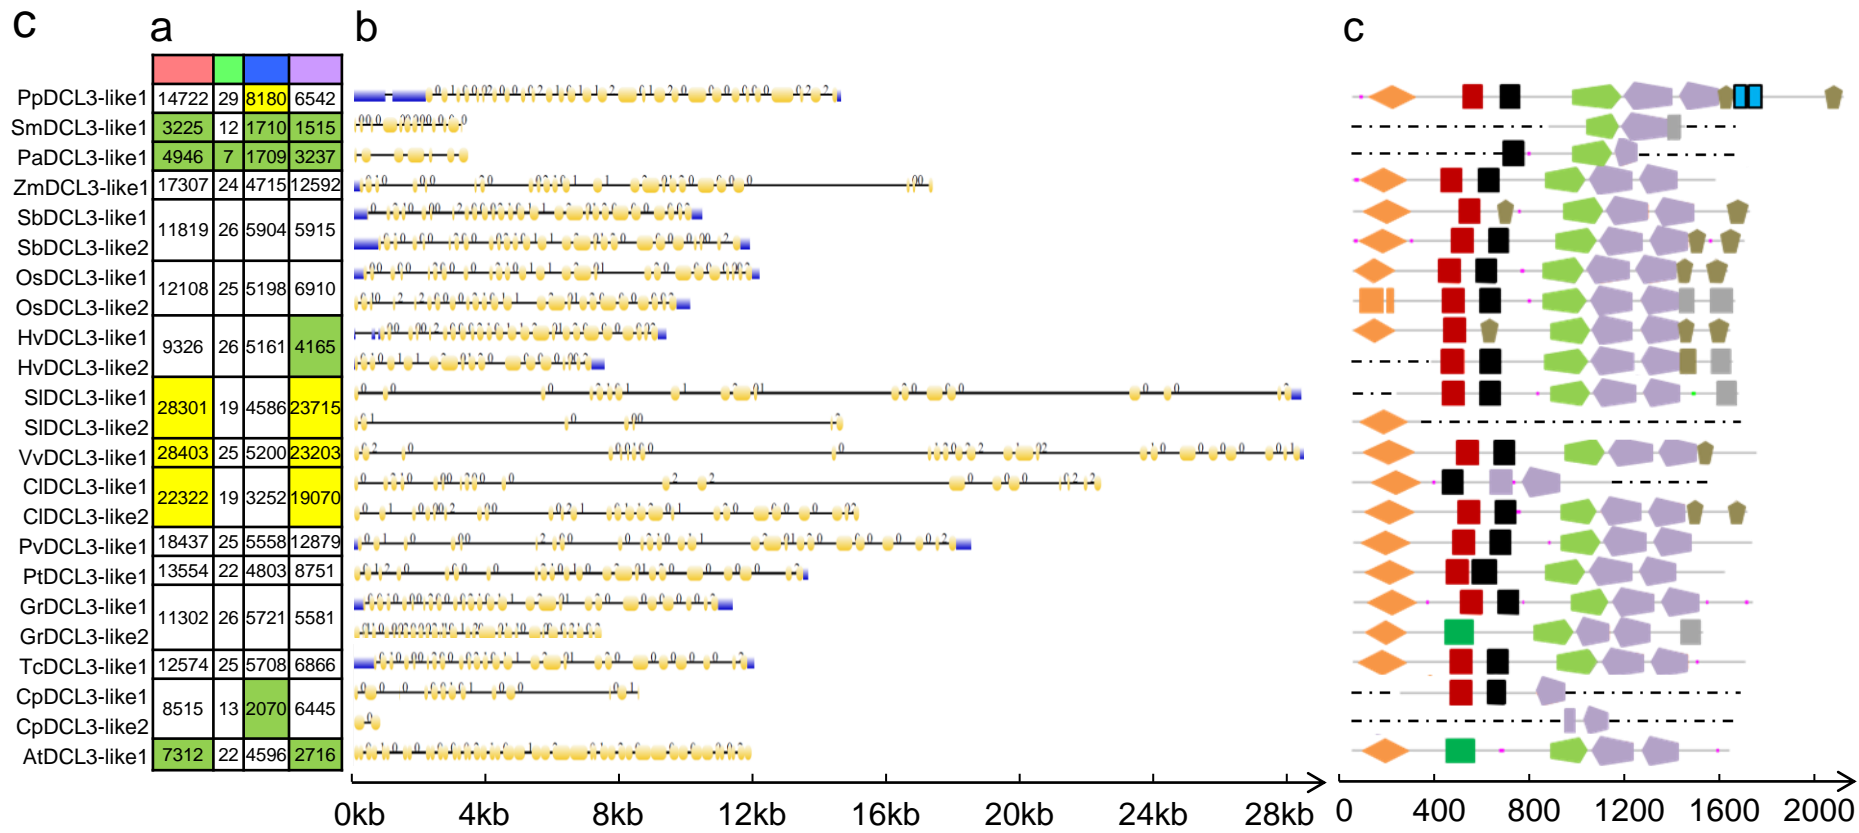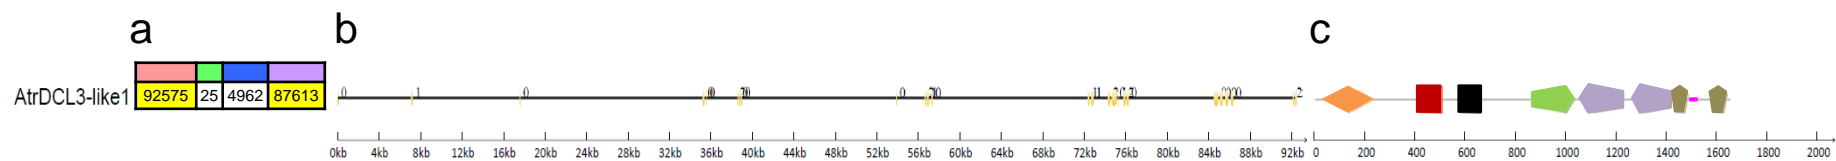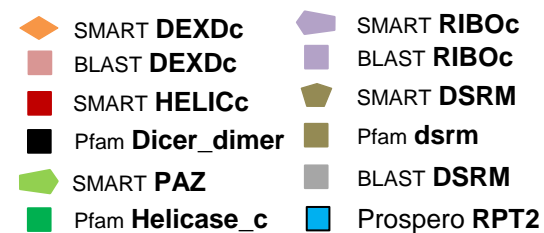

D

a

b

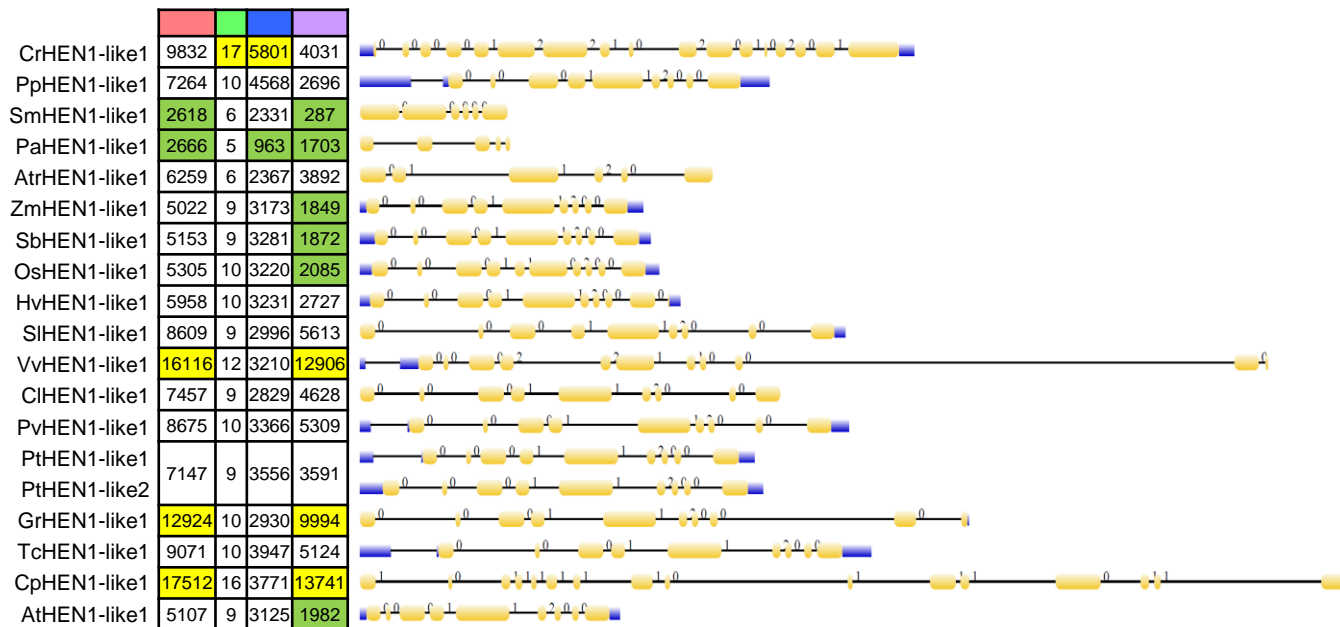

c

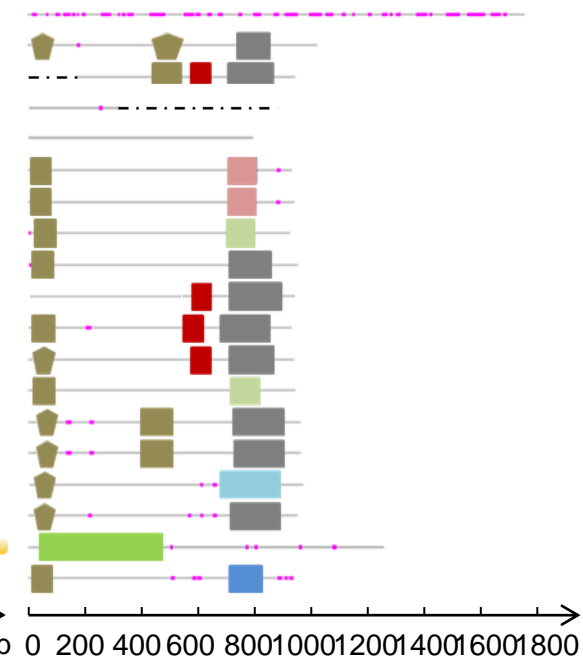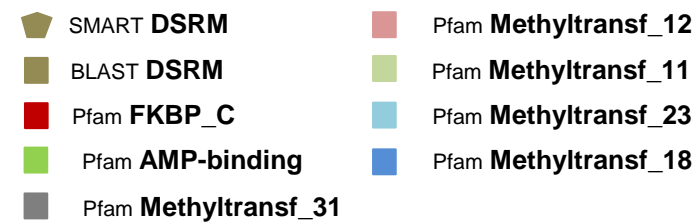

E

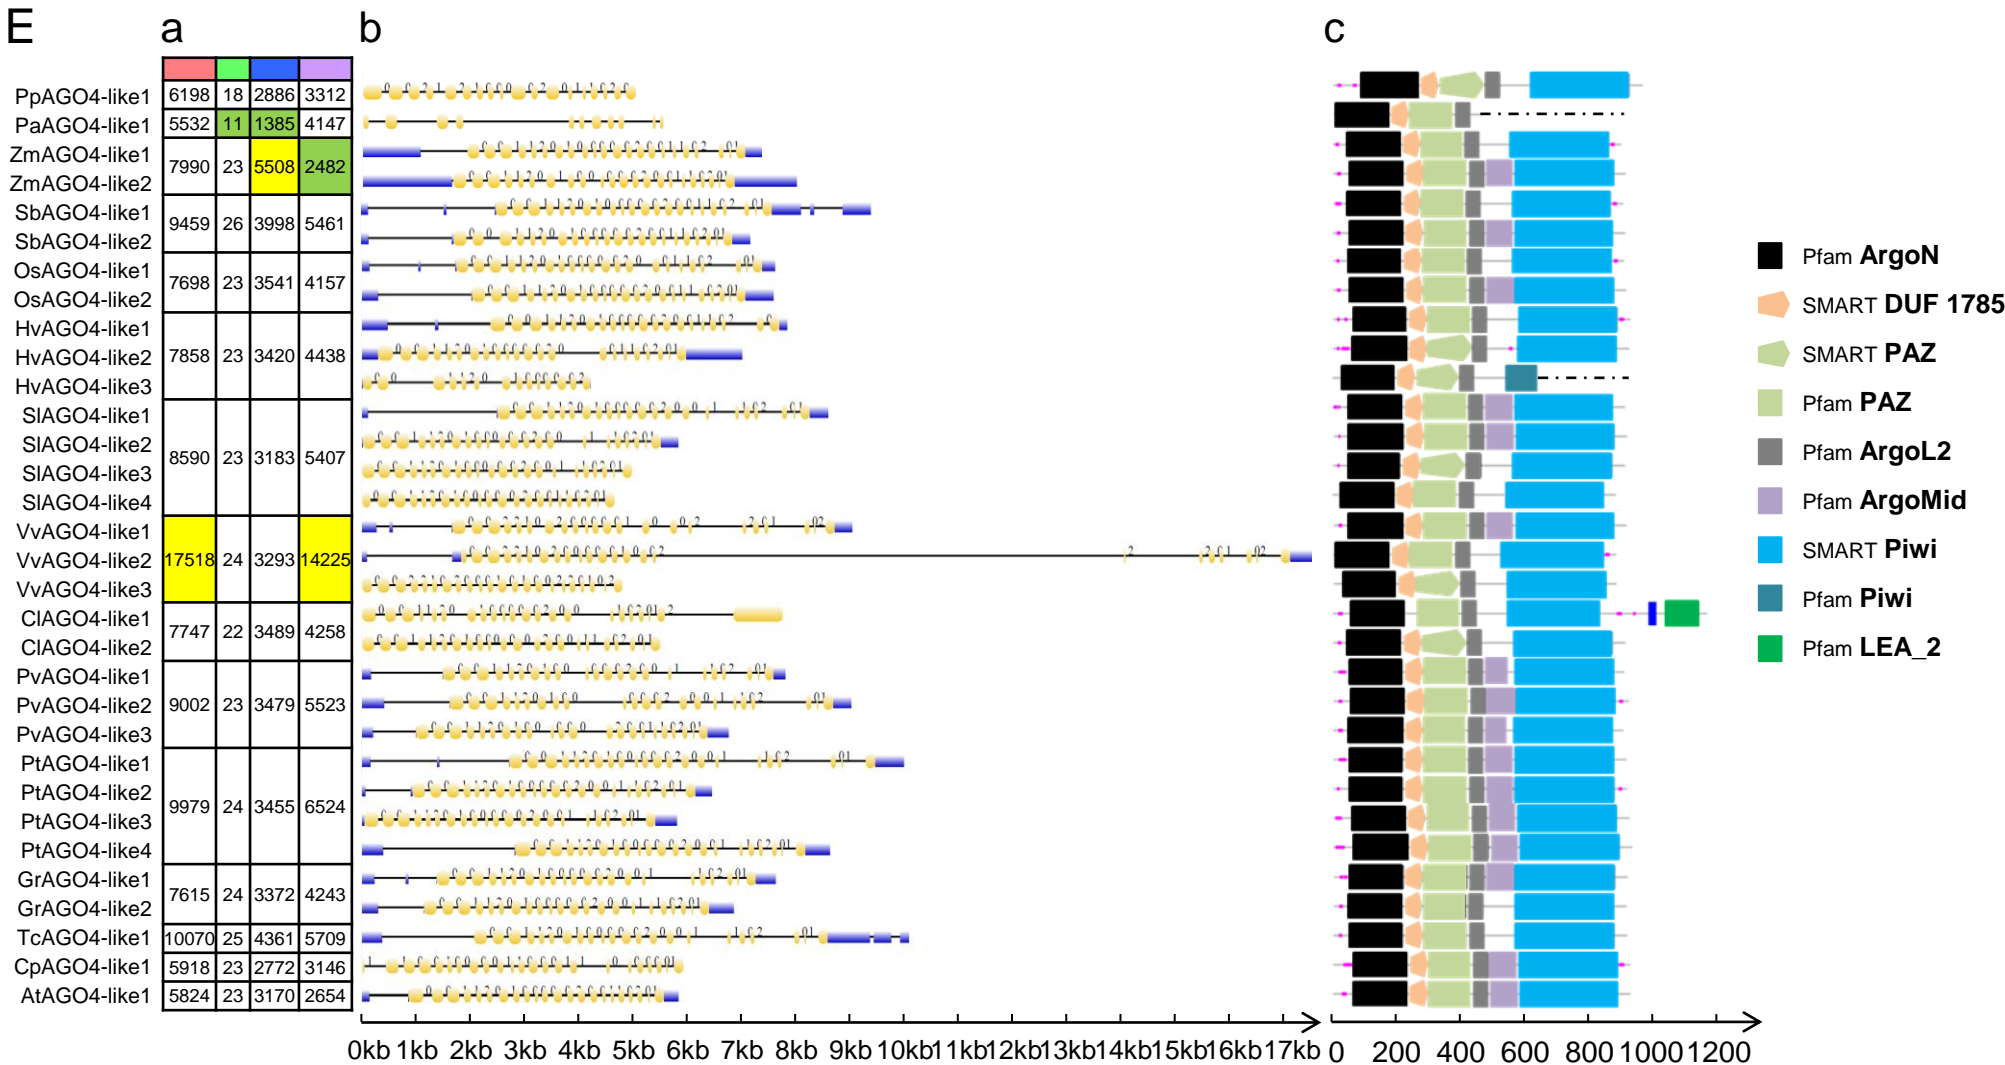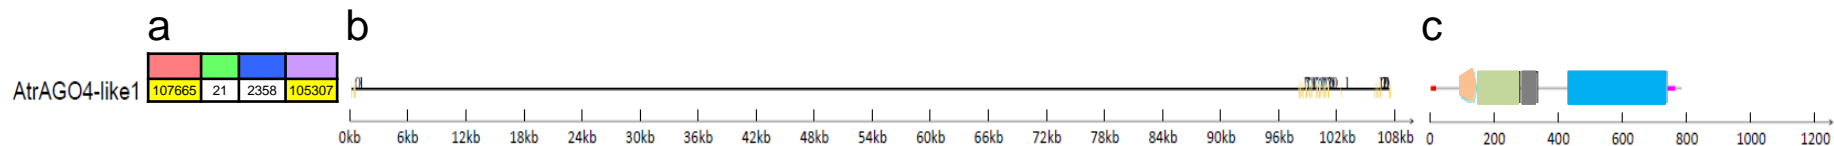

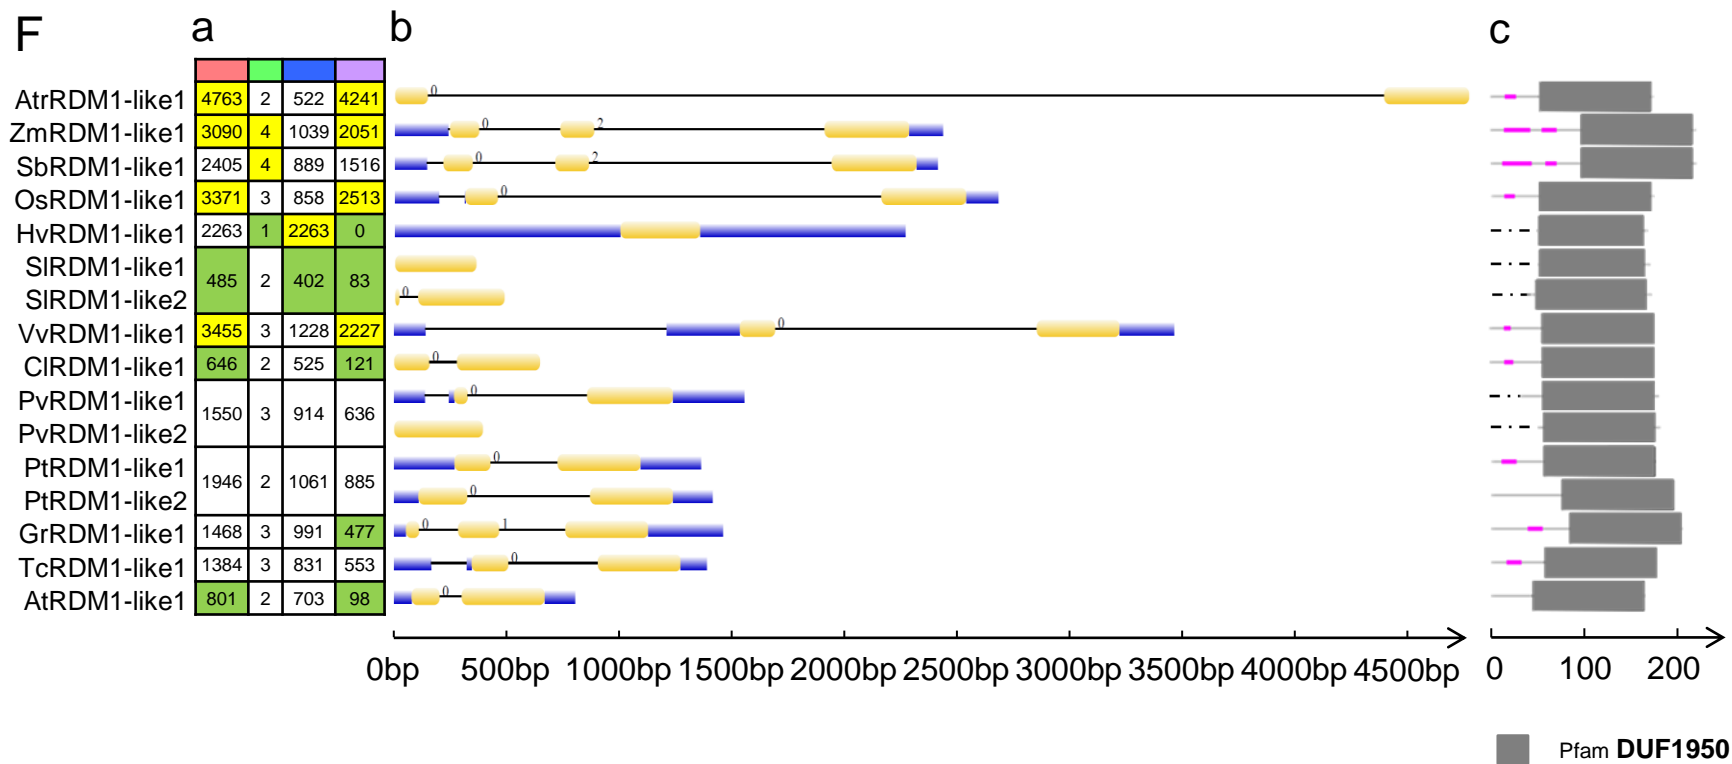

**G****a****b**

|               |       |    |      |       |
|---------------|-------|----|------|-------|
| PpDRD1-like1  | 3988  | 4  | 3472 | 516   |
| PpDRD1-like2  |       |    |      |       |
| PaDRD1-like1  |       |    |      |       |
| PaDRD1-like2  | 3372  | 4  | 1770 | 1602  |
| PaDRD1-like3  |       |    |      |       |
| AtrDRD1-like1 | 15347 | 9  | 3285 | 12062 |
| SbDRD1-like1  | 6488  | 7  | 4126 | 2362  |
| SbDRD1-like2  |       |    |      |       |
| OsDRD1-like1  |       |    |      |       |
| OsDRD1-like2  | 9537  | 12 | 3447 | 6090  |
| OsDRD1-like3  |       |    |      |       |
| OsDRD1-like4  |       |    |      |       |
| HvDRD1-like1  |       |    |      |       |
| HvDRD1-like2  | 6706  | 6  | 3465 | 3241  |
| HvDRD1-like3  |       |    |      |       |
| SIDRD1-like1  | 7778  | 7  | 3144 | 4634  |
| VvDRD1-like1  | 16190 | 10 | 2974 | 13216 |
| VvDRD1-like2  |       |    |      |       |
| CIDRD1-like1  | 4946  | 5  | 2550 | 2396  |
| PvDRD1-like1  | 6631  | 6  | 3084 | 3547  |
| PvDRD1-like2  |       |    |      |       |
| PtDRD1-like1  | 5025  | 7  | 3211 | 1814  |
| PtDRD1-like2  |       |    |      |       |
| GrDRD1-like1  | 7543  | 5  | 3637 | 3906  |
| GrDRD1-like2  |       |    |      |       |
| TcDRD1-like1  | 6396  | 7  | 3748 | 2648  |
| CpDRD1-like1  | 6358  | 6  | 1242 | 5116  |
| AtDRD1-like1  | 3982  | 5  | 3104 | 878   |

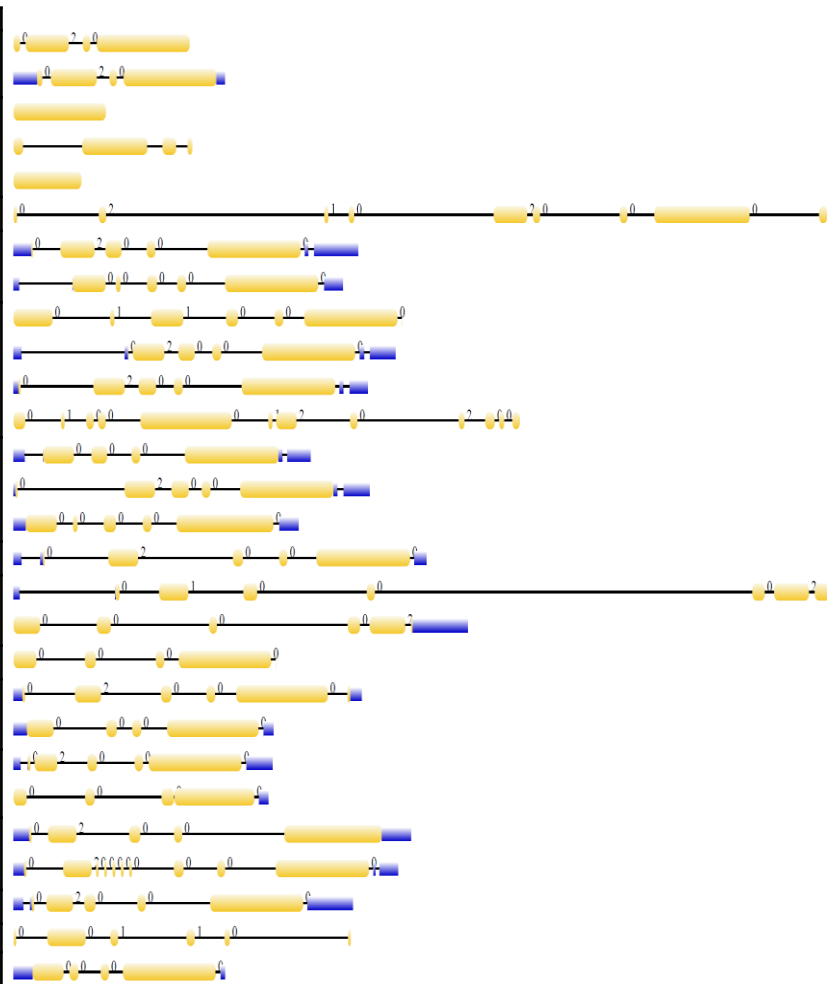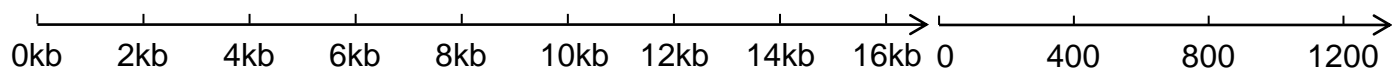**c**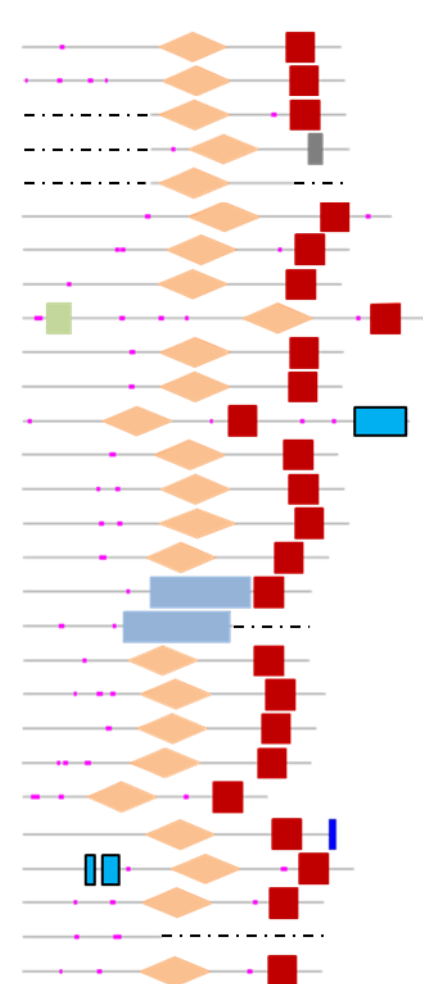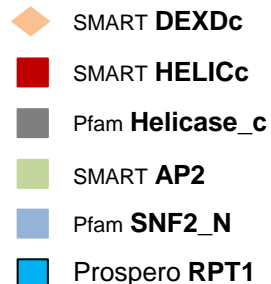**a****b**

|              |       |   |      |       |
|--------------|-------|---|------|-------|
| ZmDRD1-like1 | 54149 | 9 | 3478 | 50671 |
| ZmDRD1-like2 |       |   |      |       |

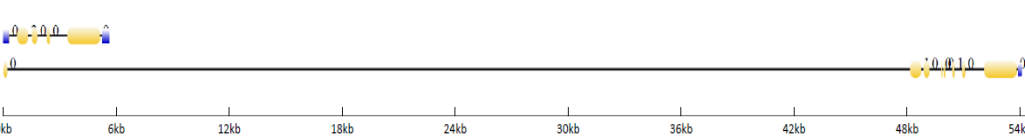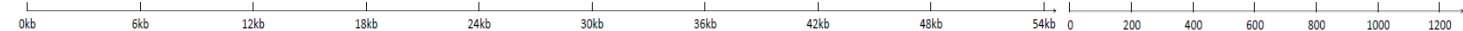**c**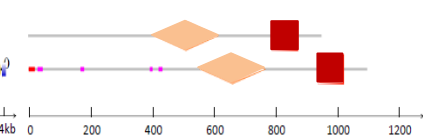

**H****a****b****c**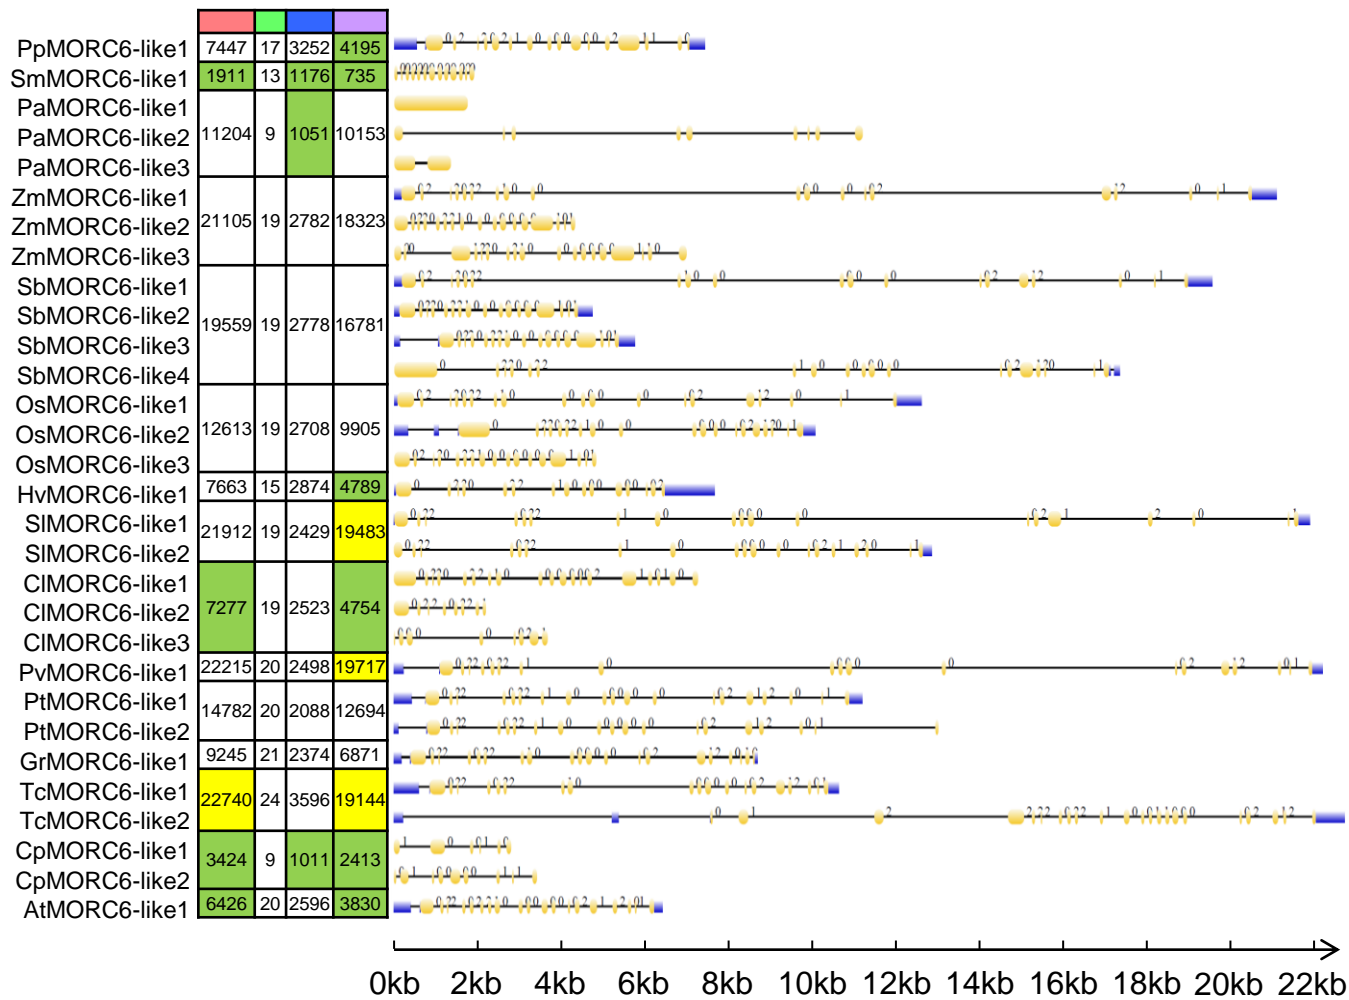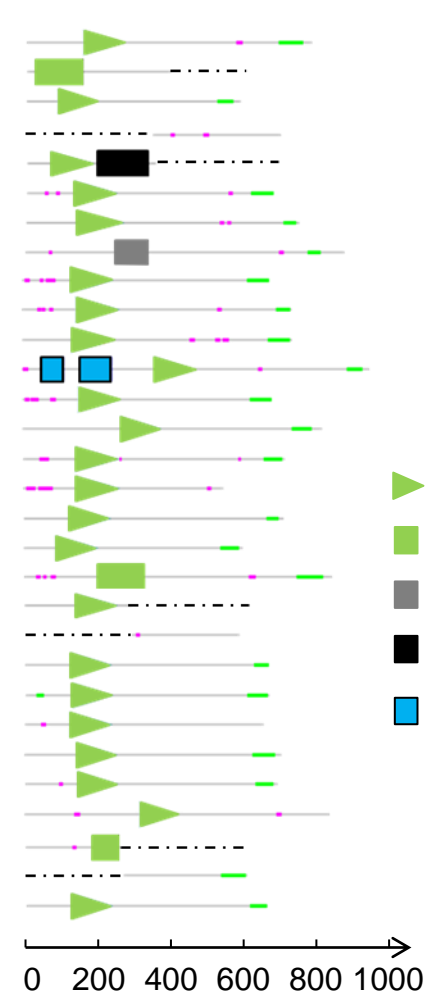**a****b****c**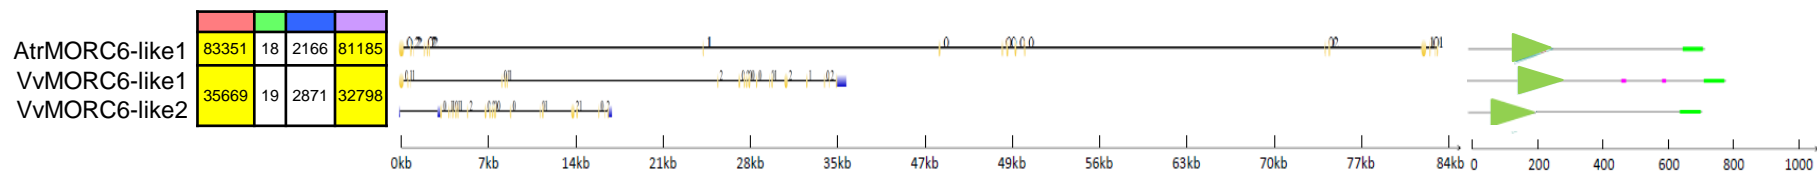



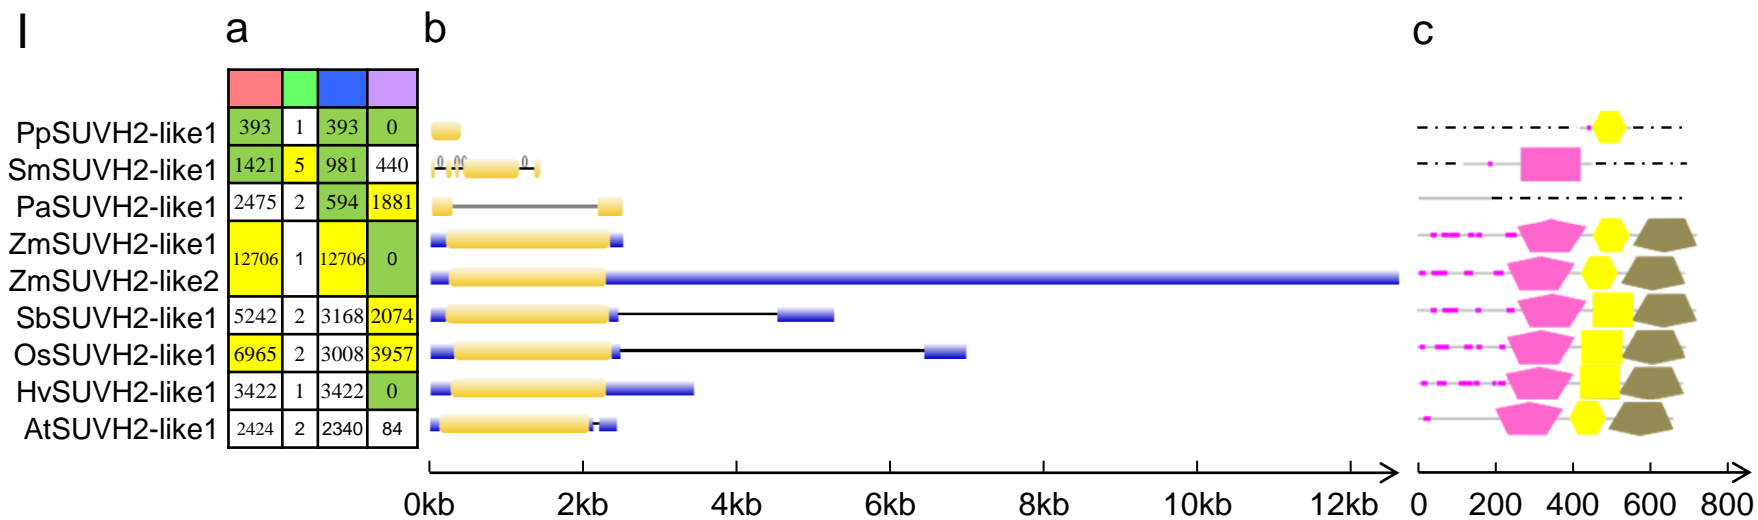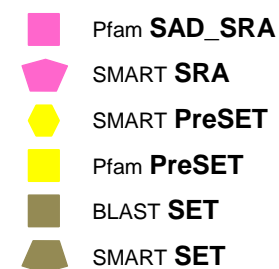

J

a

b

c

|                |      |   |      |      |
|----------------|------|---|------|------|
| SmSUVH9-like1  | 589  | 2 | 537  | 22   |
| PaSUVH9-like1  |      |   |      |      |
| PaSUVH9-like2  | 3393 | 3 | 2526 | 867  |
| PaSUVH9-like3  |      |   |      |      |
| AtrSUVH9-like1 | 2562 | 1 | 2562 | 0    |
| ZmSUVH9-like1  | 2449 | 1 | 2449 | 0    |
| SbSUVH9-like1  | 3857 | 1 | 3857 | 0    |
| OsSUVH9-like1  | 2157 | 1 | 2157 | 0    |
| HvSUVH9-like1  | 3023 | 1 | 3023 | 0    |
| SISUVH9-like1  | 2222 | 2 | 1998 | 224  |
| SISUVH9-like2  |      |   |      |      |
| VvSUVH9-like1  | 2019 | 3 | 1767 | 252  |
| CISUVH9-like1  | 2079 | 1 | 2079 | 0    |
| PvSUVH9-like1  | 6804 | 2 | 2393 | 4411 |
| PvSUVH9-like2  |      |   |      |      |
| PtSUVH9-like1  | 5923 | 3 | 2924 | 2999 |
| PtSUVH9-like2  |      |   |      |      |
| GrSUVH9-like1  | 3295 | 2 | 3169 | 126  |
| TcSUVH9-like1  | 5653 | 2 | 2690 | 2963 |
| CpSUVH9-like1  | 2034 | 1 | 2034 | 0    |
| AtSUVH9-like1  | 2971 | 3 | 2534 | 437  |

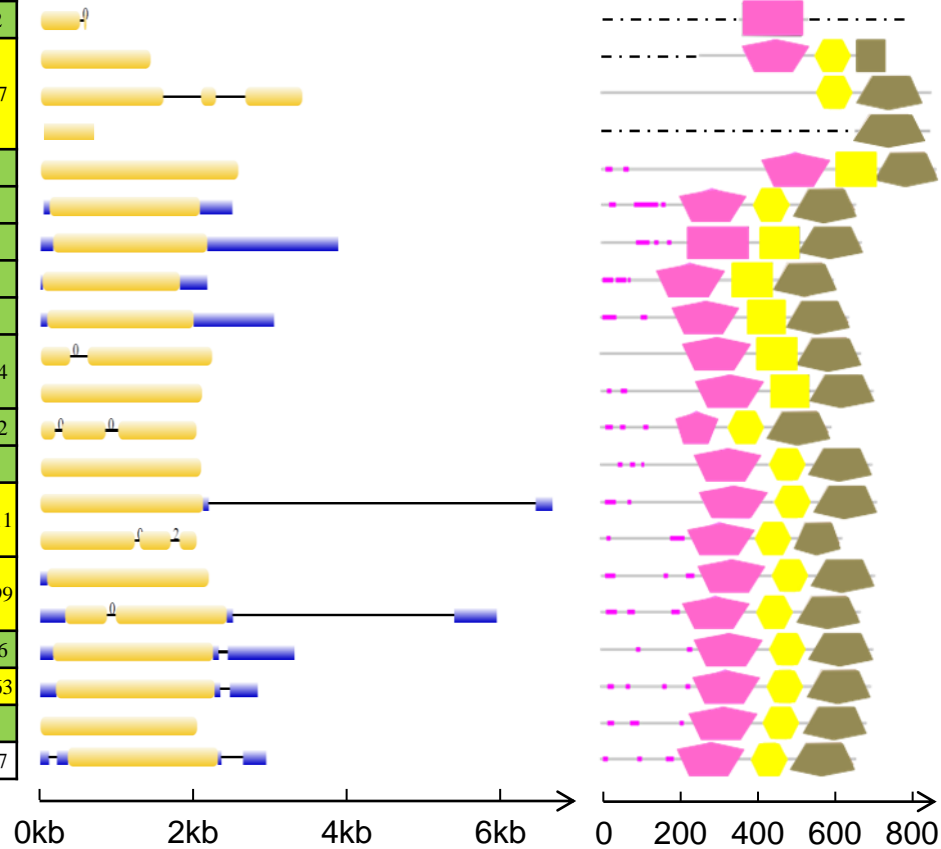

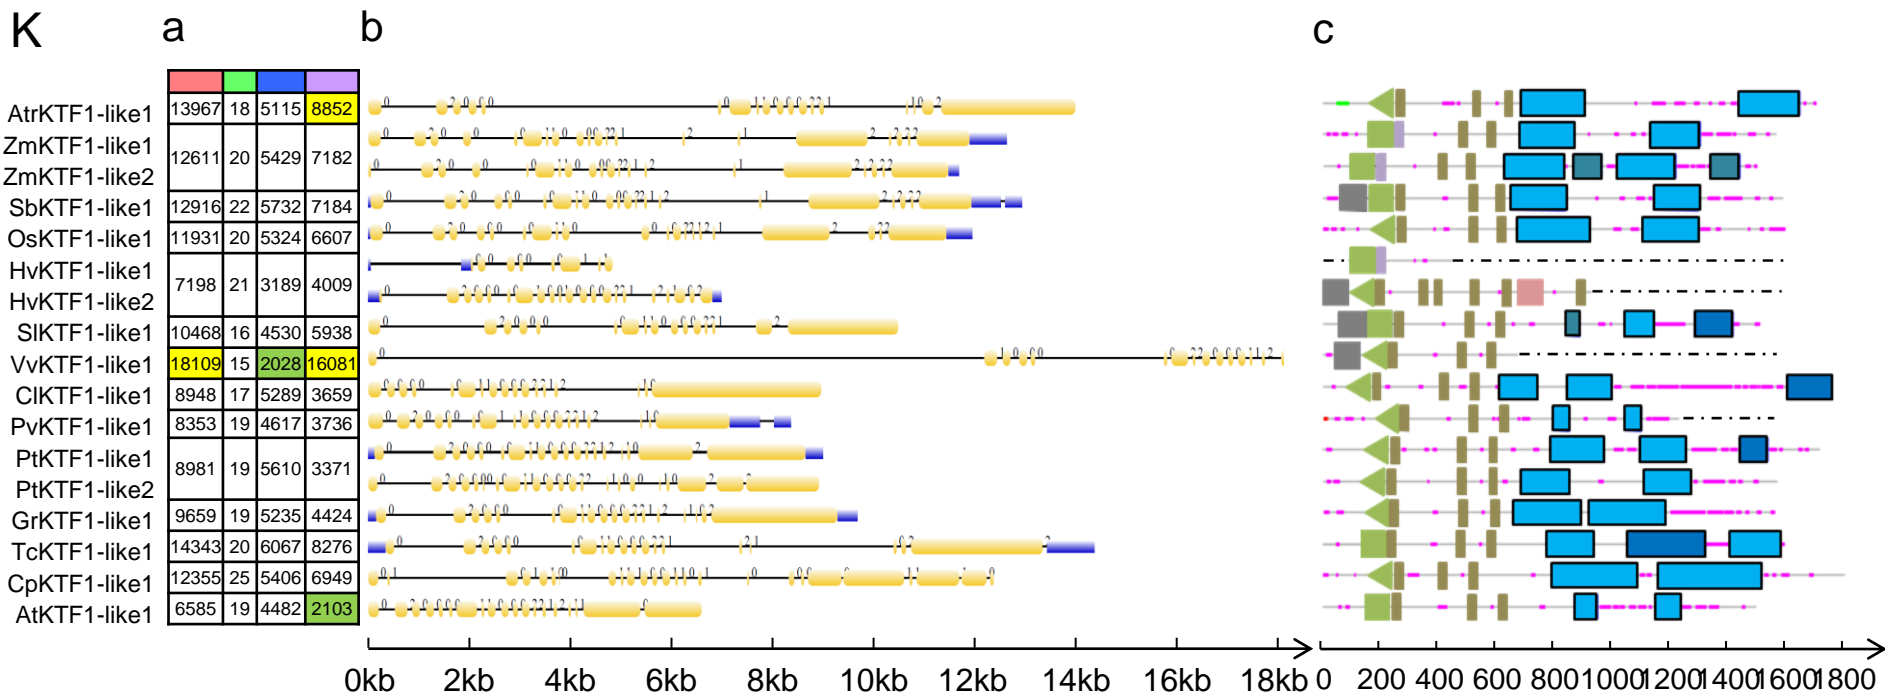

- Pfam **Spt5-N**
- ◀ SMART **NGN**
- Pfam **Spt5-NGN**
- SMART **KOW**
- BLAST **KOW**
- BLAST **CTD**
- Prospero **RPT1**
- Prospero **RPT2**
- Prospero **RPT3**

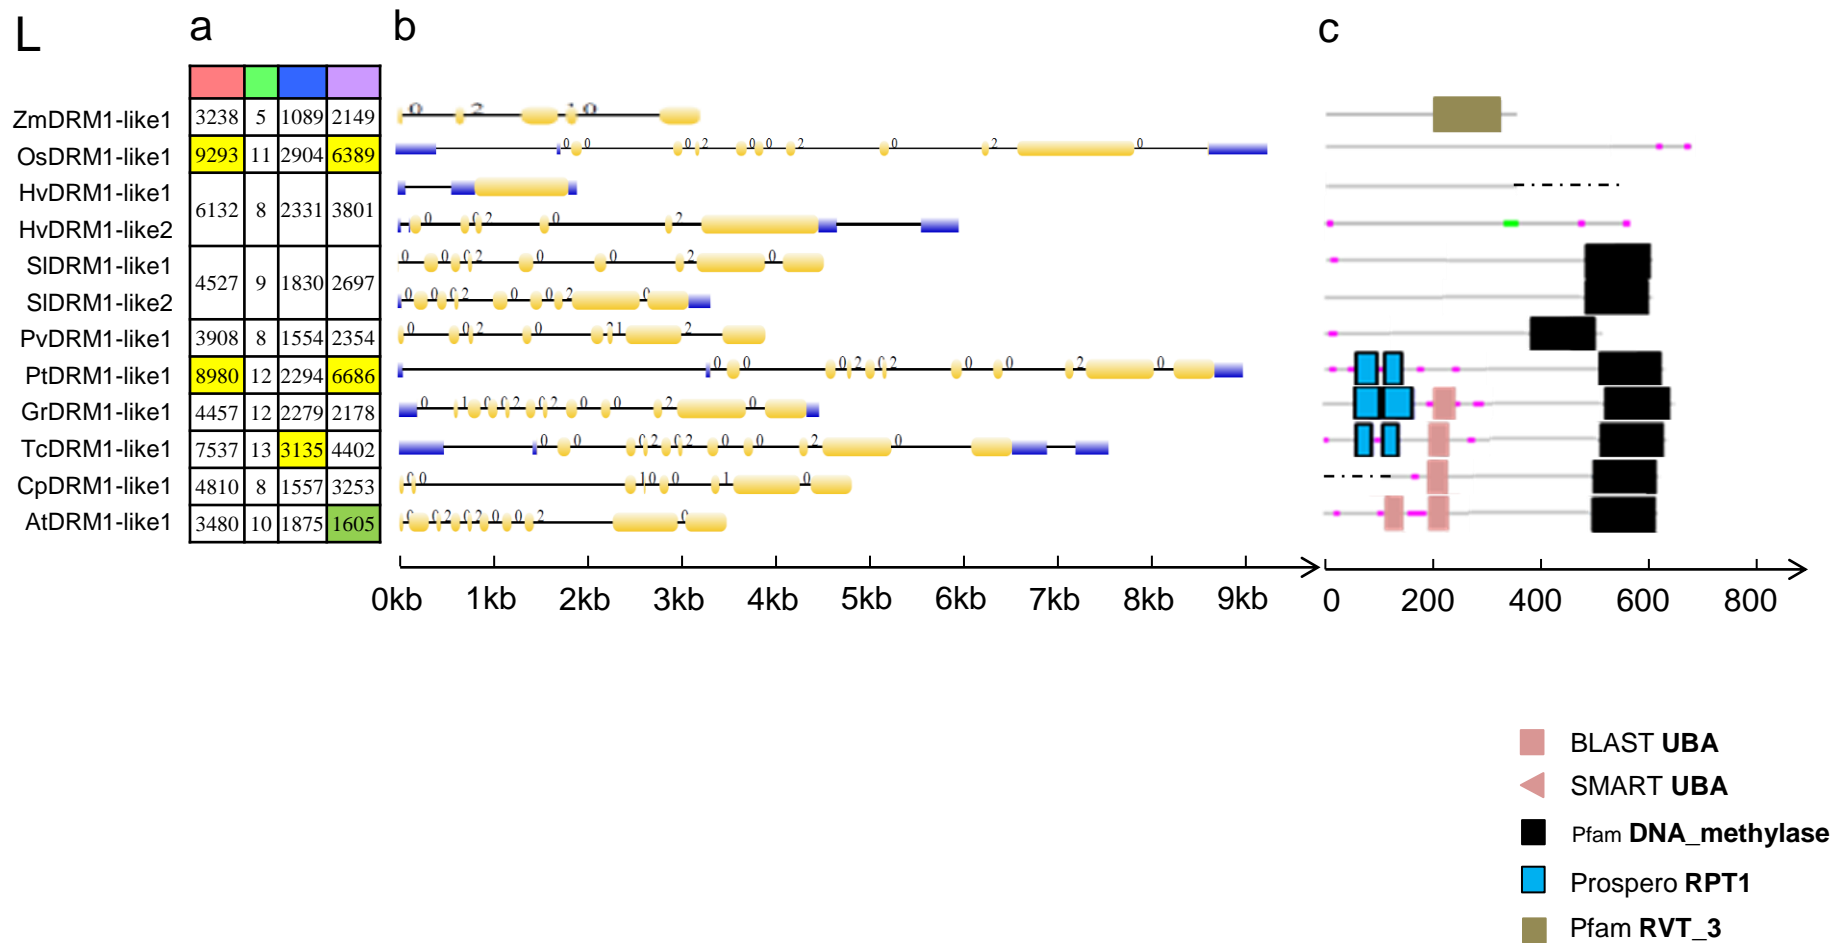

M

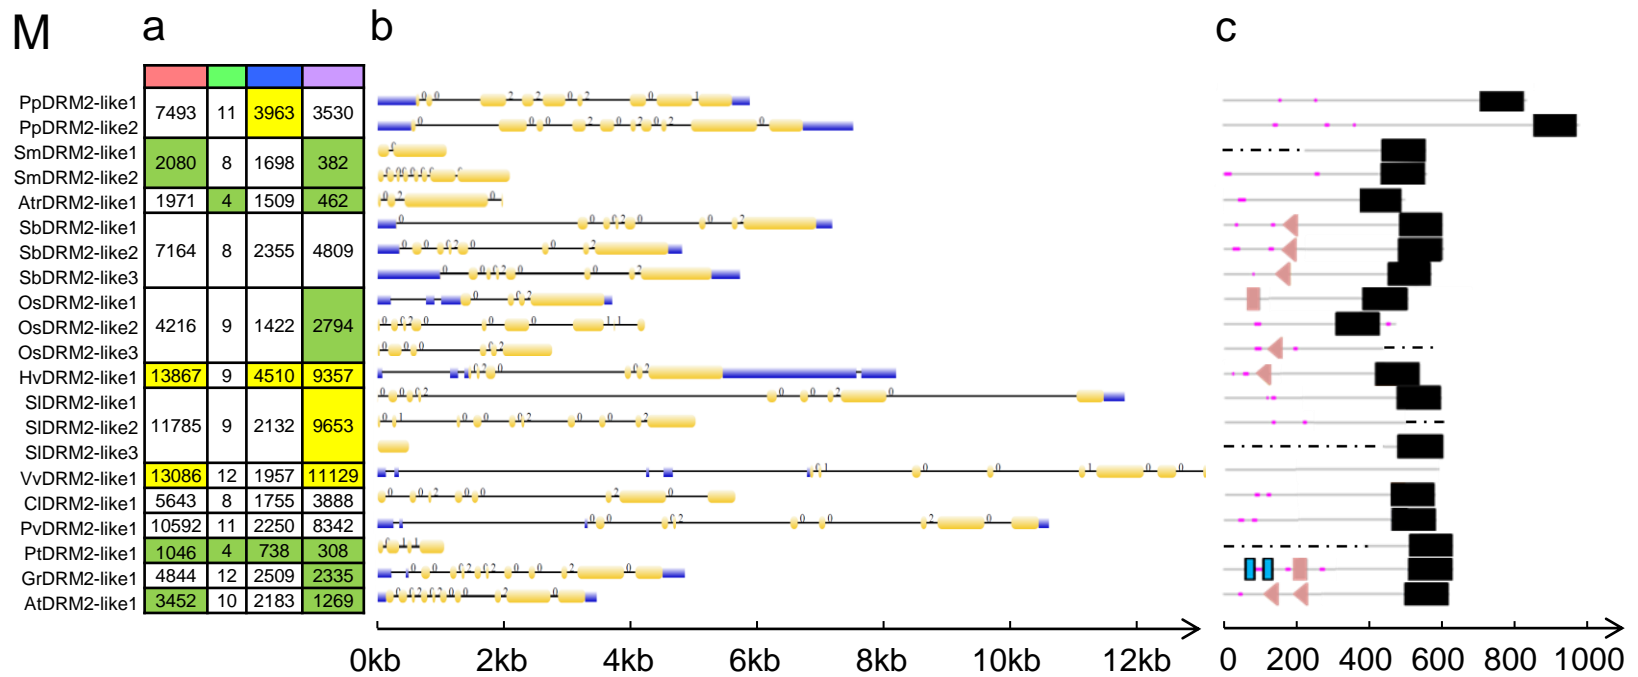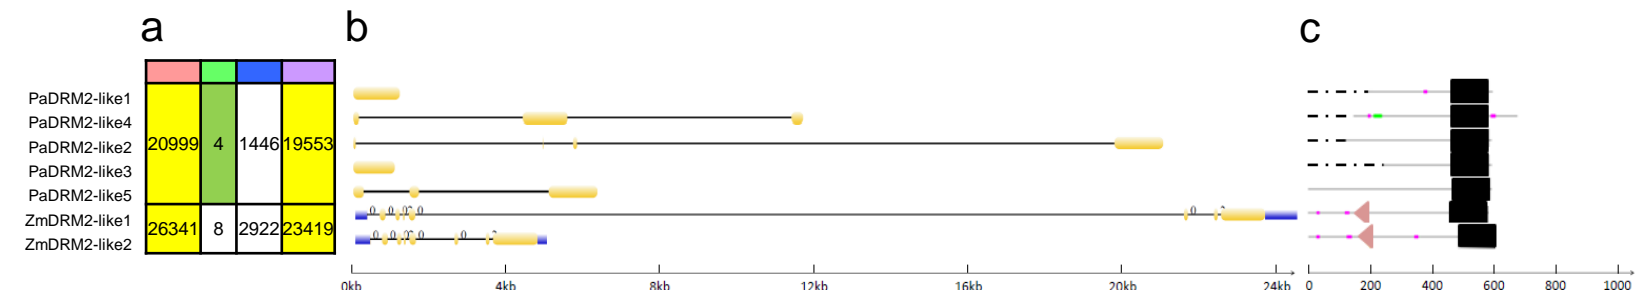

■ BLAST UBA  
◀ SMART UBA  
■ Pfam DNA\_methylase

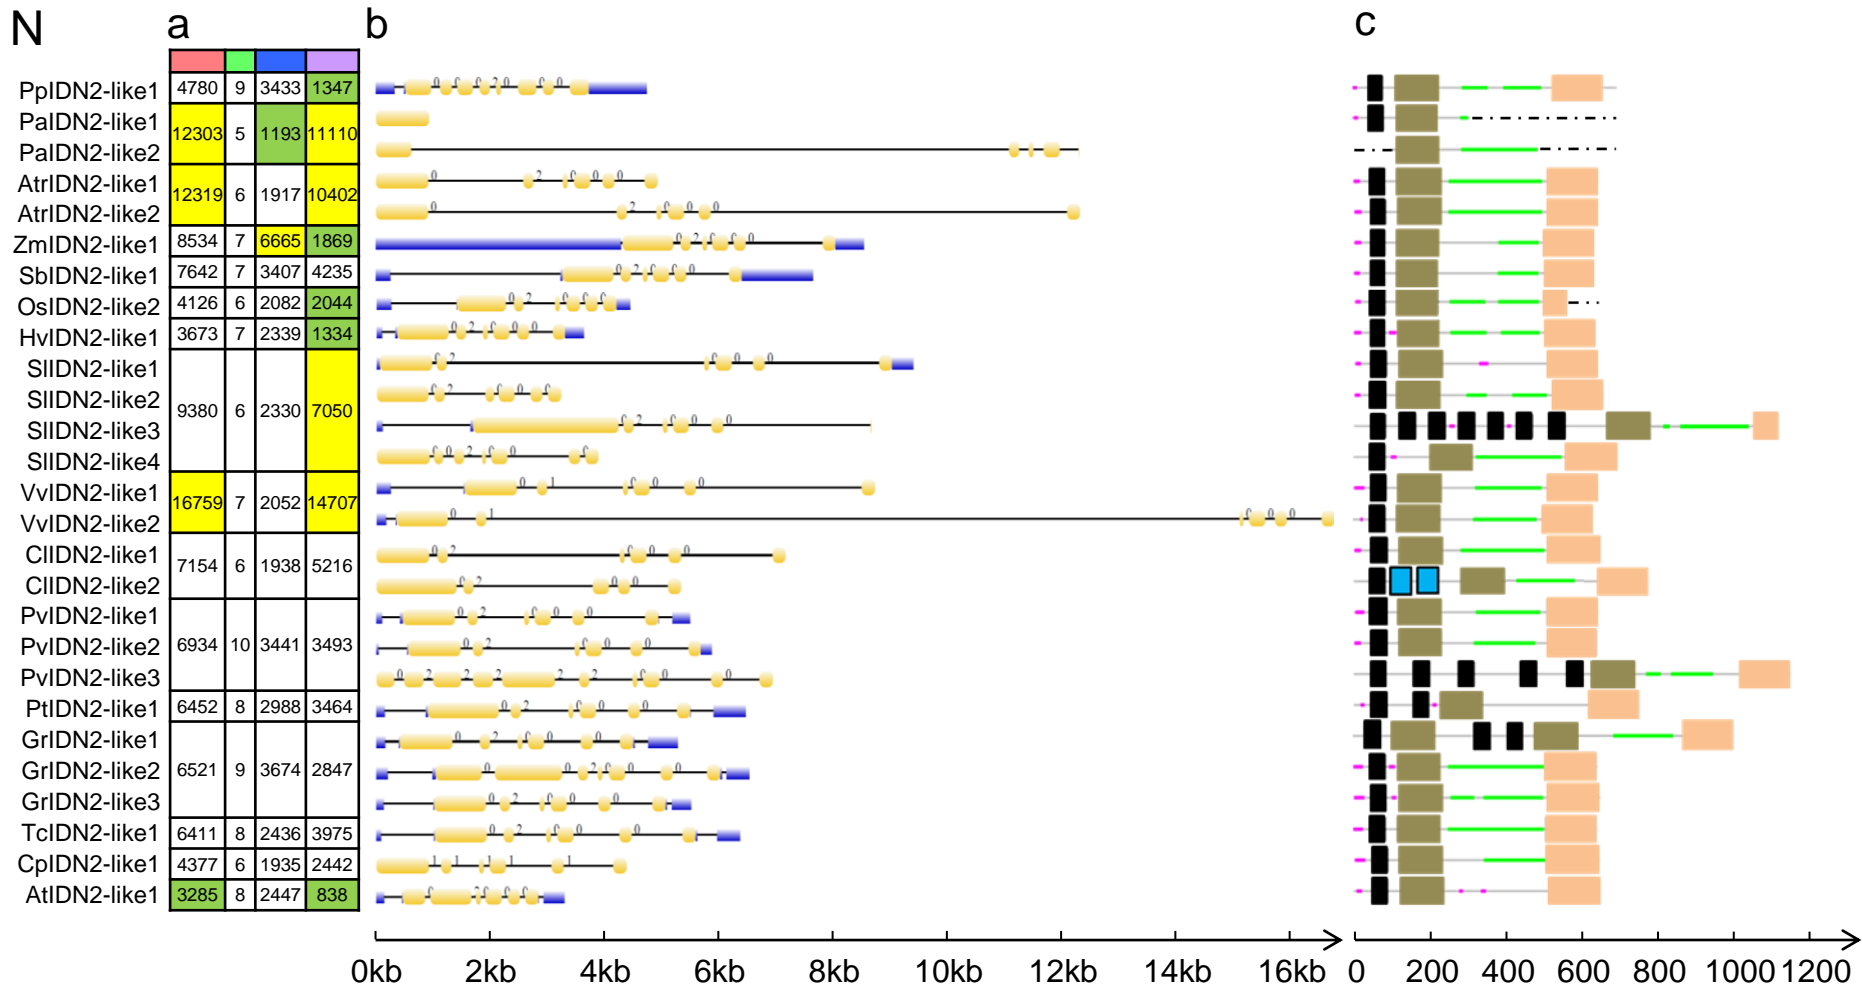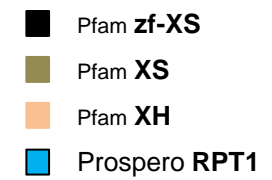

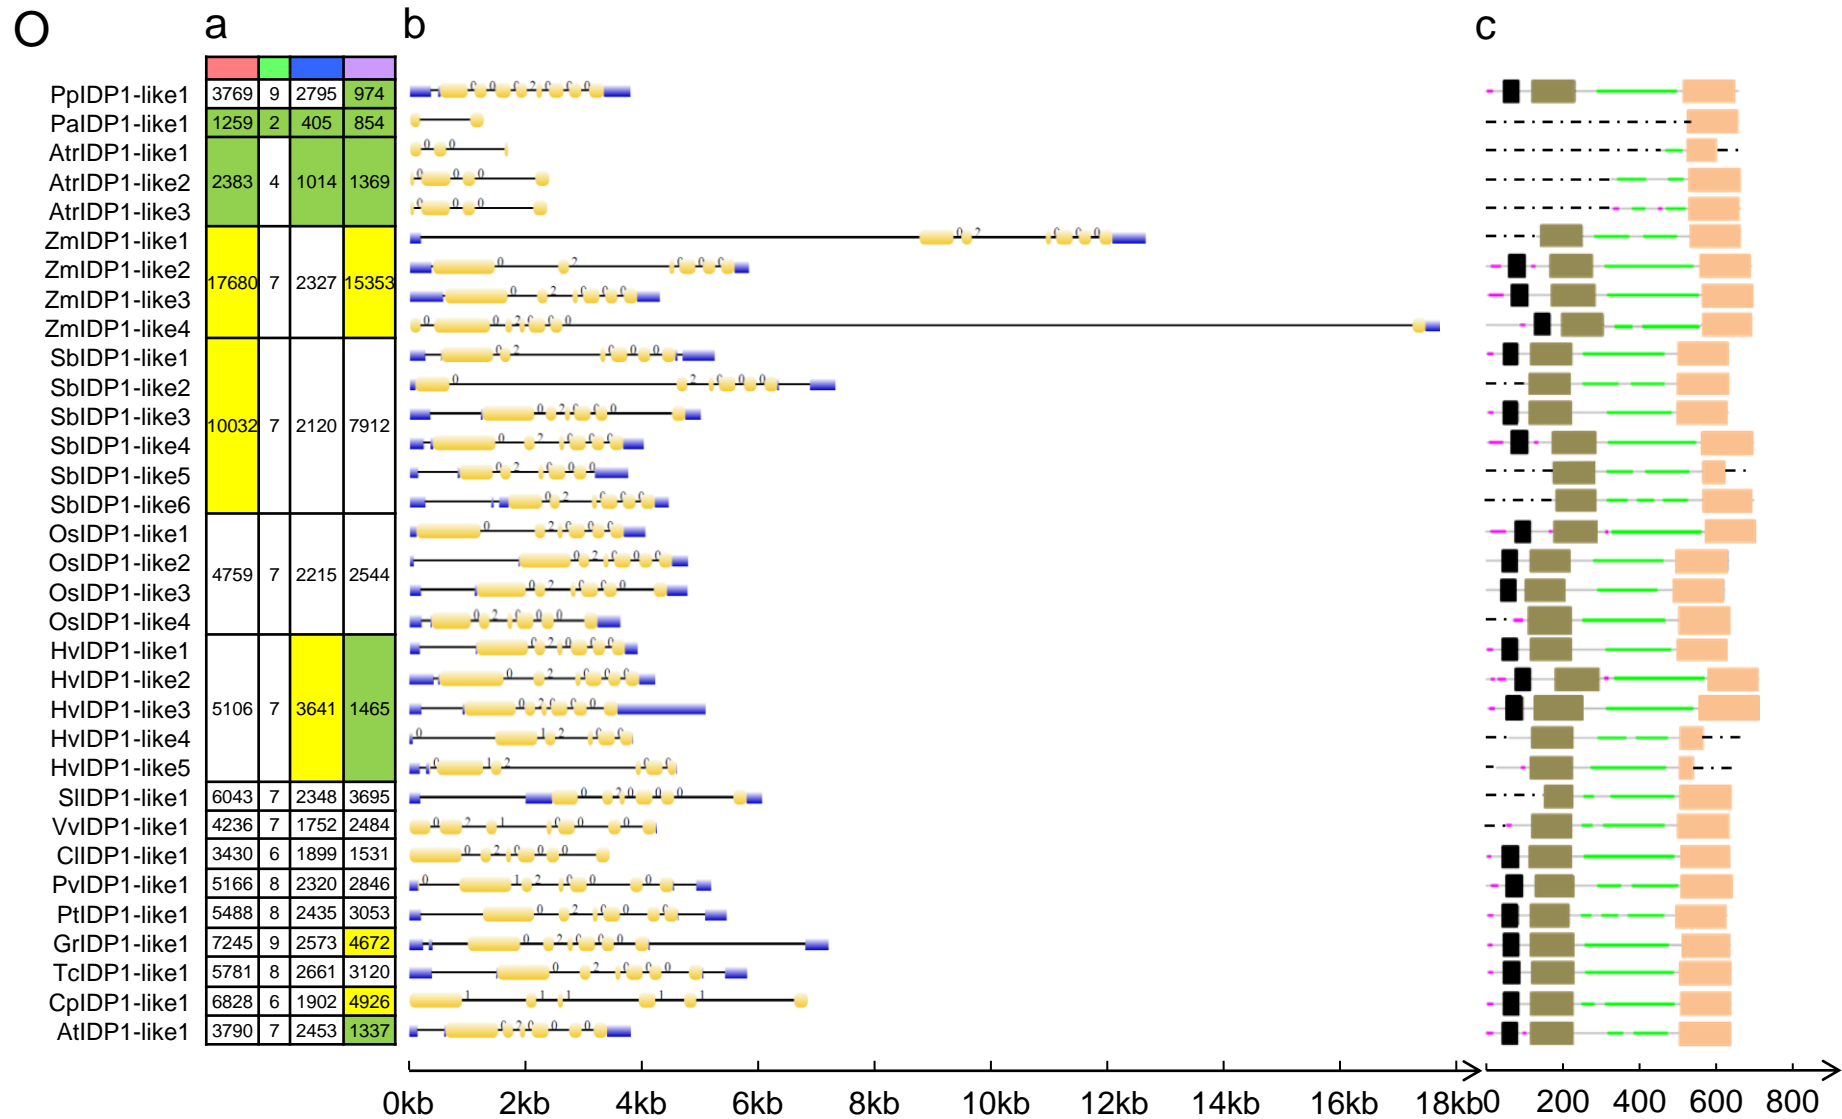

Pfam **zf-XS**  
 Pfam **XS**  
 Pfam **XH**

P

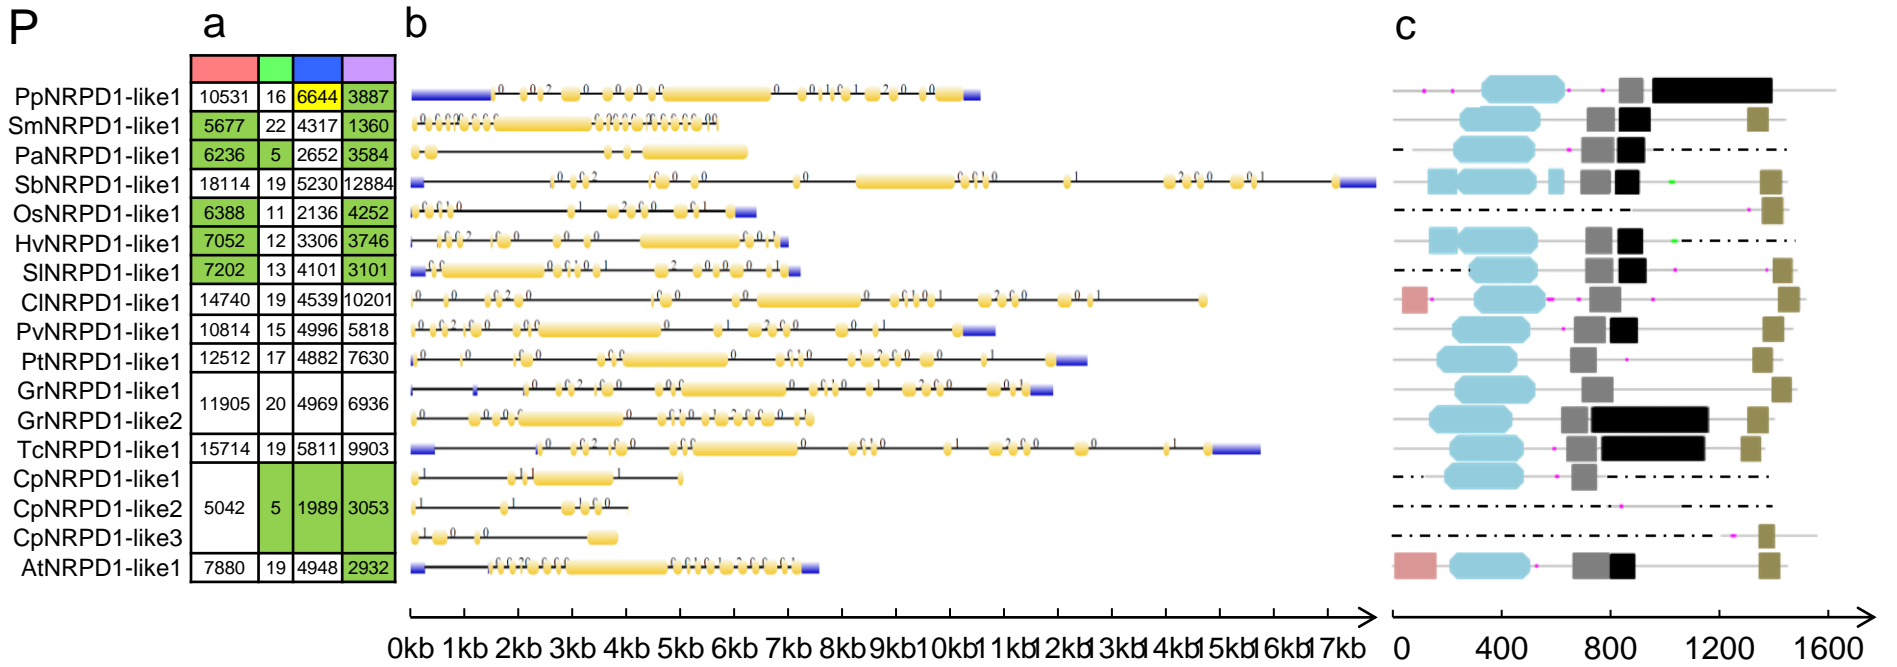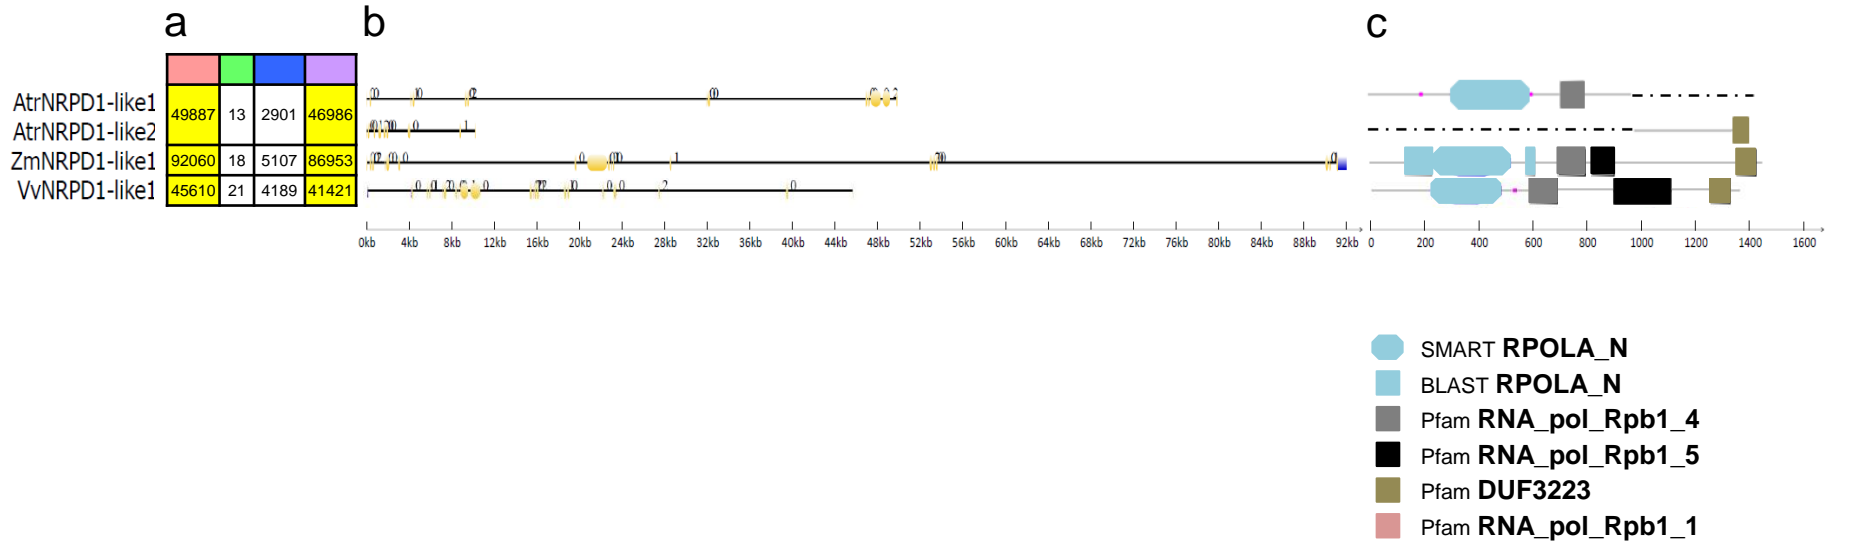

- SMART **RPOLA\_N**
- BLAST **RPOLA\_N**
- Pfam **RNA\_pol\_Rpb1\_4**
- Pfam **RNA\_pol\_Rpb1\_5**
- Pfam **DUF3223**
- Pfam **RNA\_pol\_Rpb1\_1**



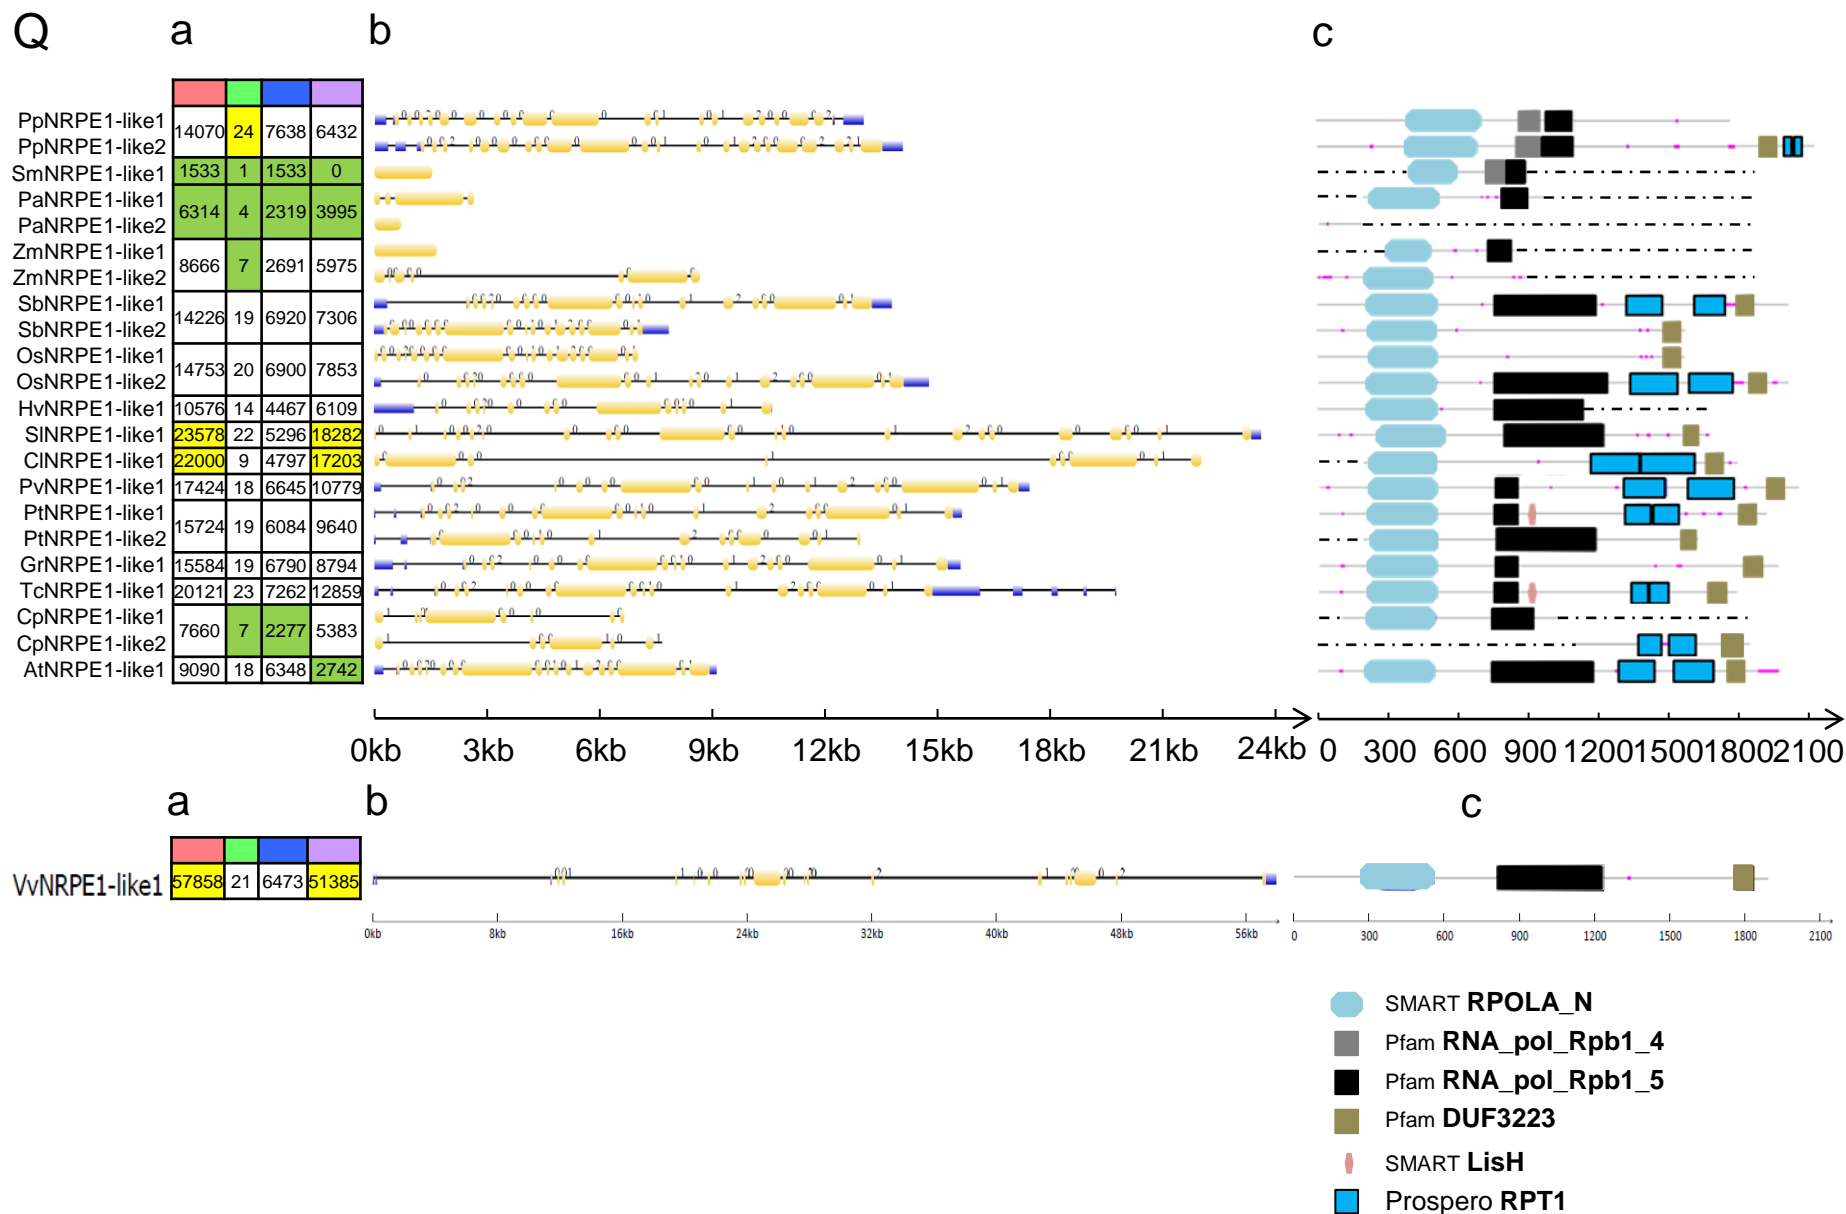

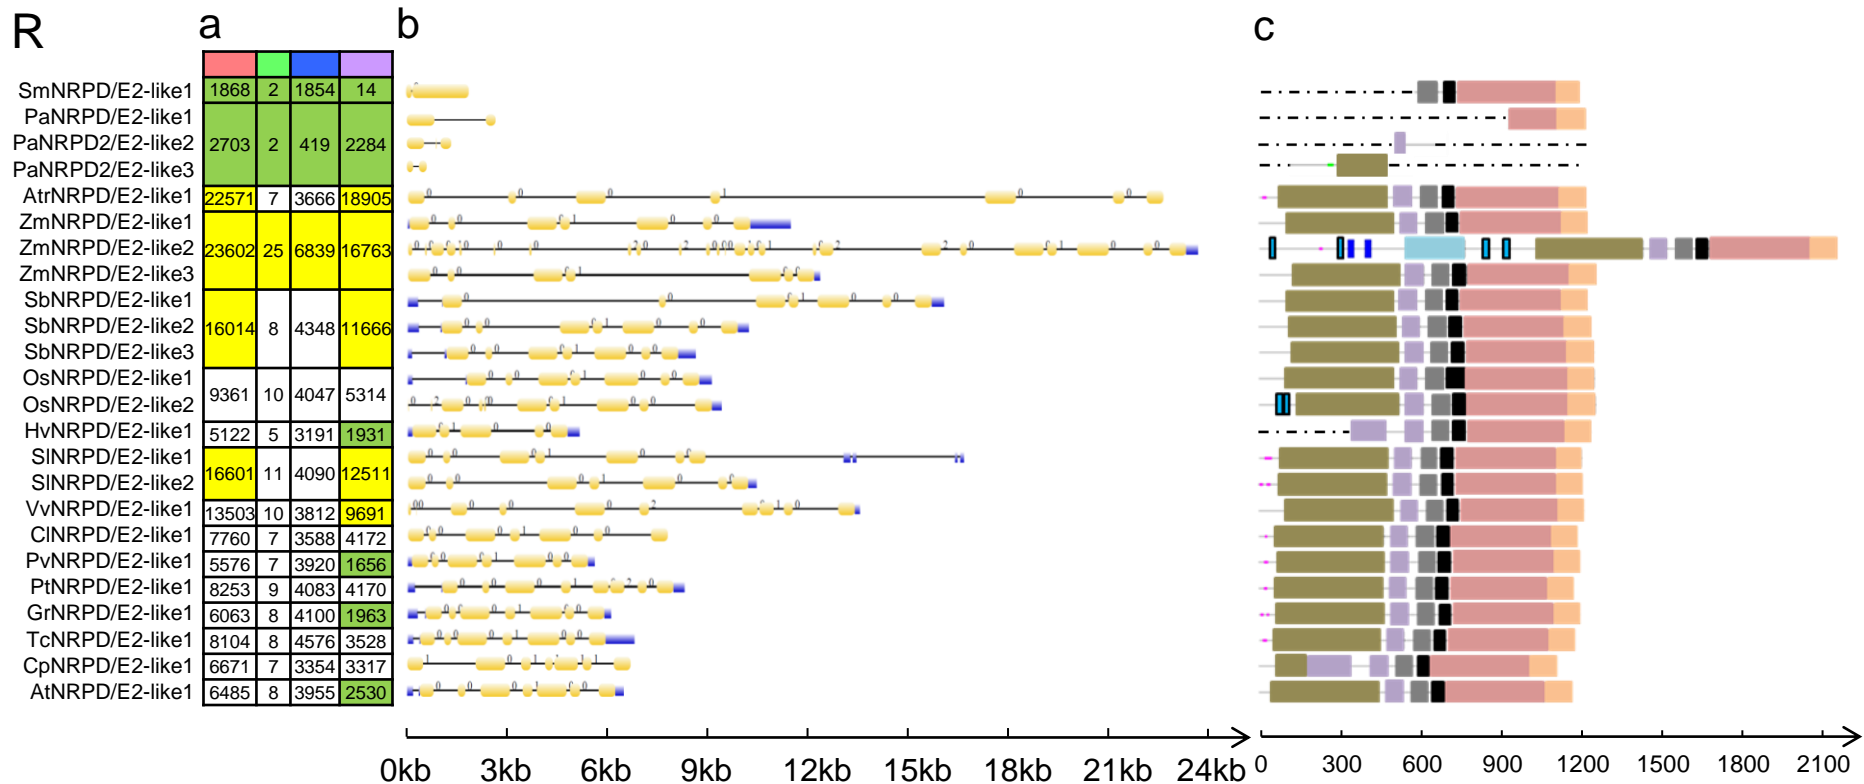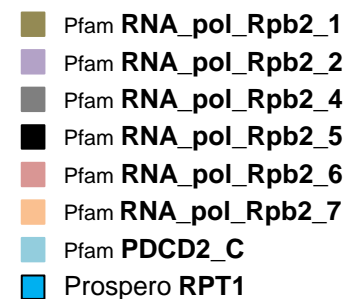

**S****a**

|                  |      |    |      |      |
|------------------|------|----|------|------|
| AtrNRPD/E4-like1 | 4428 | 8  | 588  | 3840 |
| ZmNRPD/E4-like1  | 6453 | 9  | 1444 | 5009 |
| SbNRPD/E4-like1  | 4378 | 9  | 1067 | 3311 |
| OsNRPD/E4-like1  | 5080 | 10 | 1319 | 3761 |
| HvNRPD/E4-like1  | 5891 | 10 | 1184 | 4707 |
| HvNRPD/E4-like2  |      |    |      |      |
| SINRPD/E4-like1  | 1815 | 6  | 815  | 1000 |
| VvNRPD/E4-like1  | 4816 | 11 | 1155 | 3661 |
| CINRPD/E4-like1  | 1463 | 5  | 405  | 1058 |
| CINRPD/E4-like2  |      |    |      |      |
| PvNRPD/E4-like1  | 3713 | 11 | 1030 | 2683 |
| PtNRPD/E4-like1  | 2926 | 9  | 1180 | 1746 |
| GrNRPD/E4-like1  | 3871 | 11 | 1713 | 2158 |
| TcNRPD/E4-like1  | 3249 | 11 | 948  | 2301 |
| CpNRPD/E4-like1  | 3447 | 6  | 558  | 2889 |
| AtNRPD/E4-like1  | 1447 | 8  | 814  | 633  |

**b**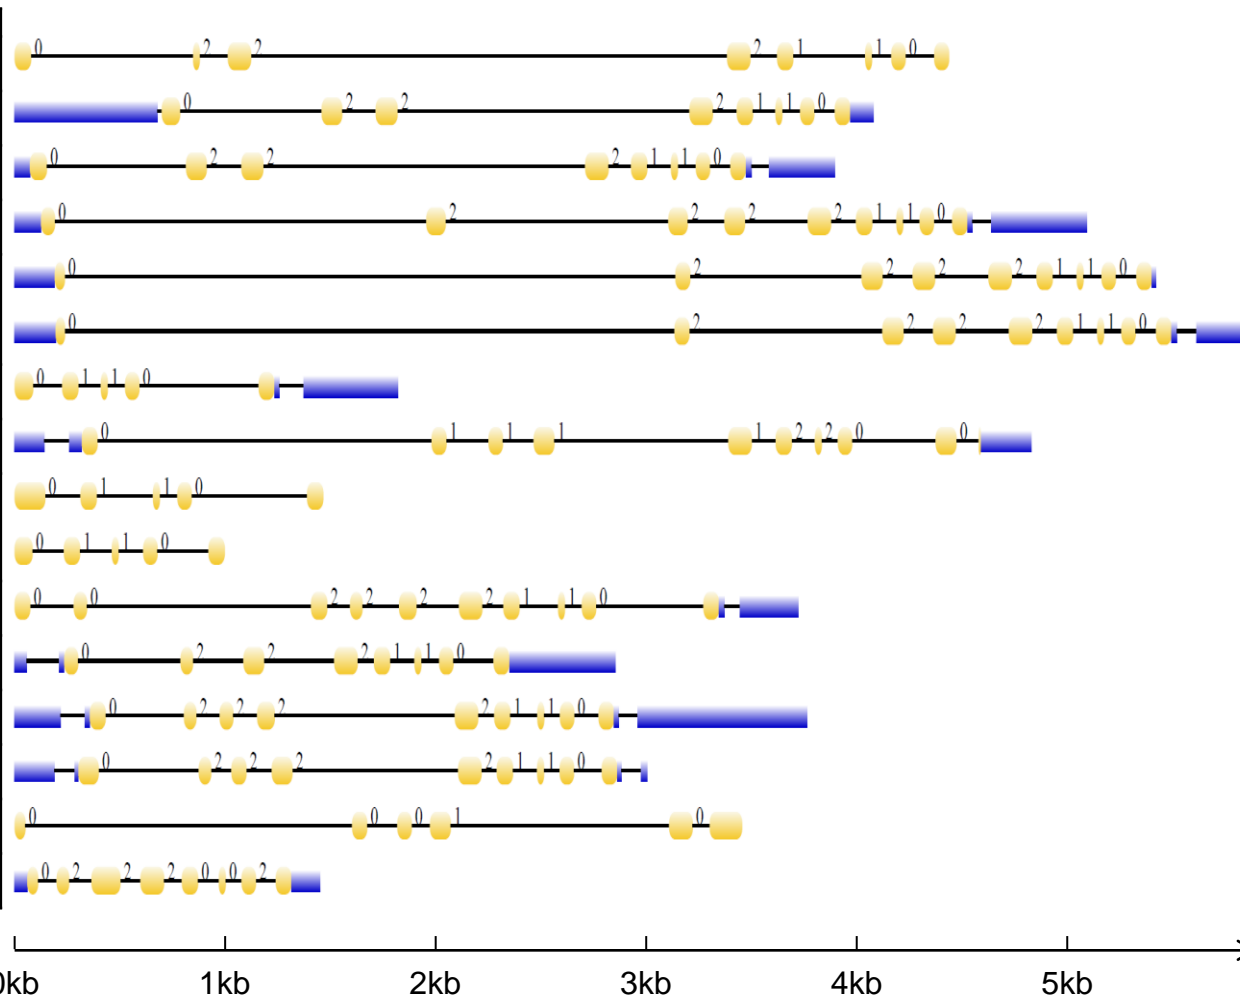**c**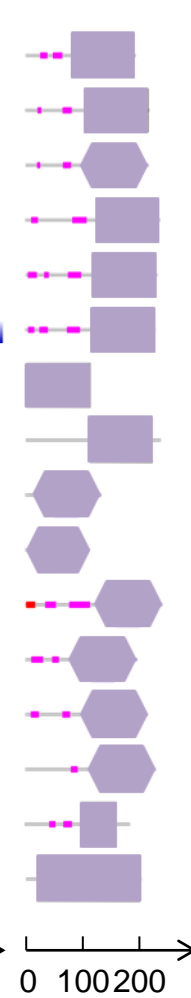

 Pfam **RNA\_pol\_Rpb4**  
 SMART **RPOL4c**

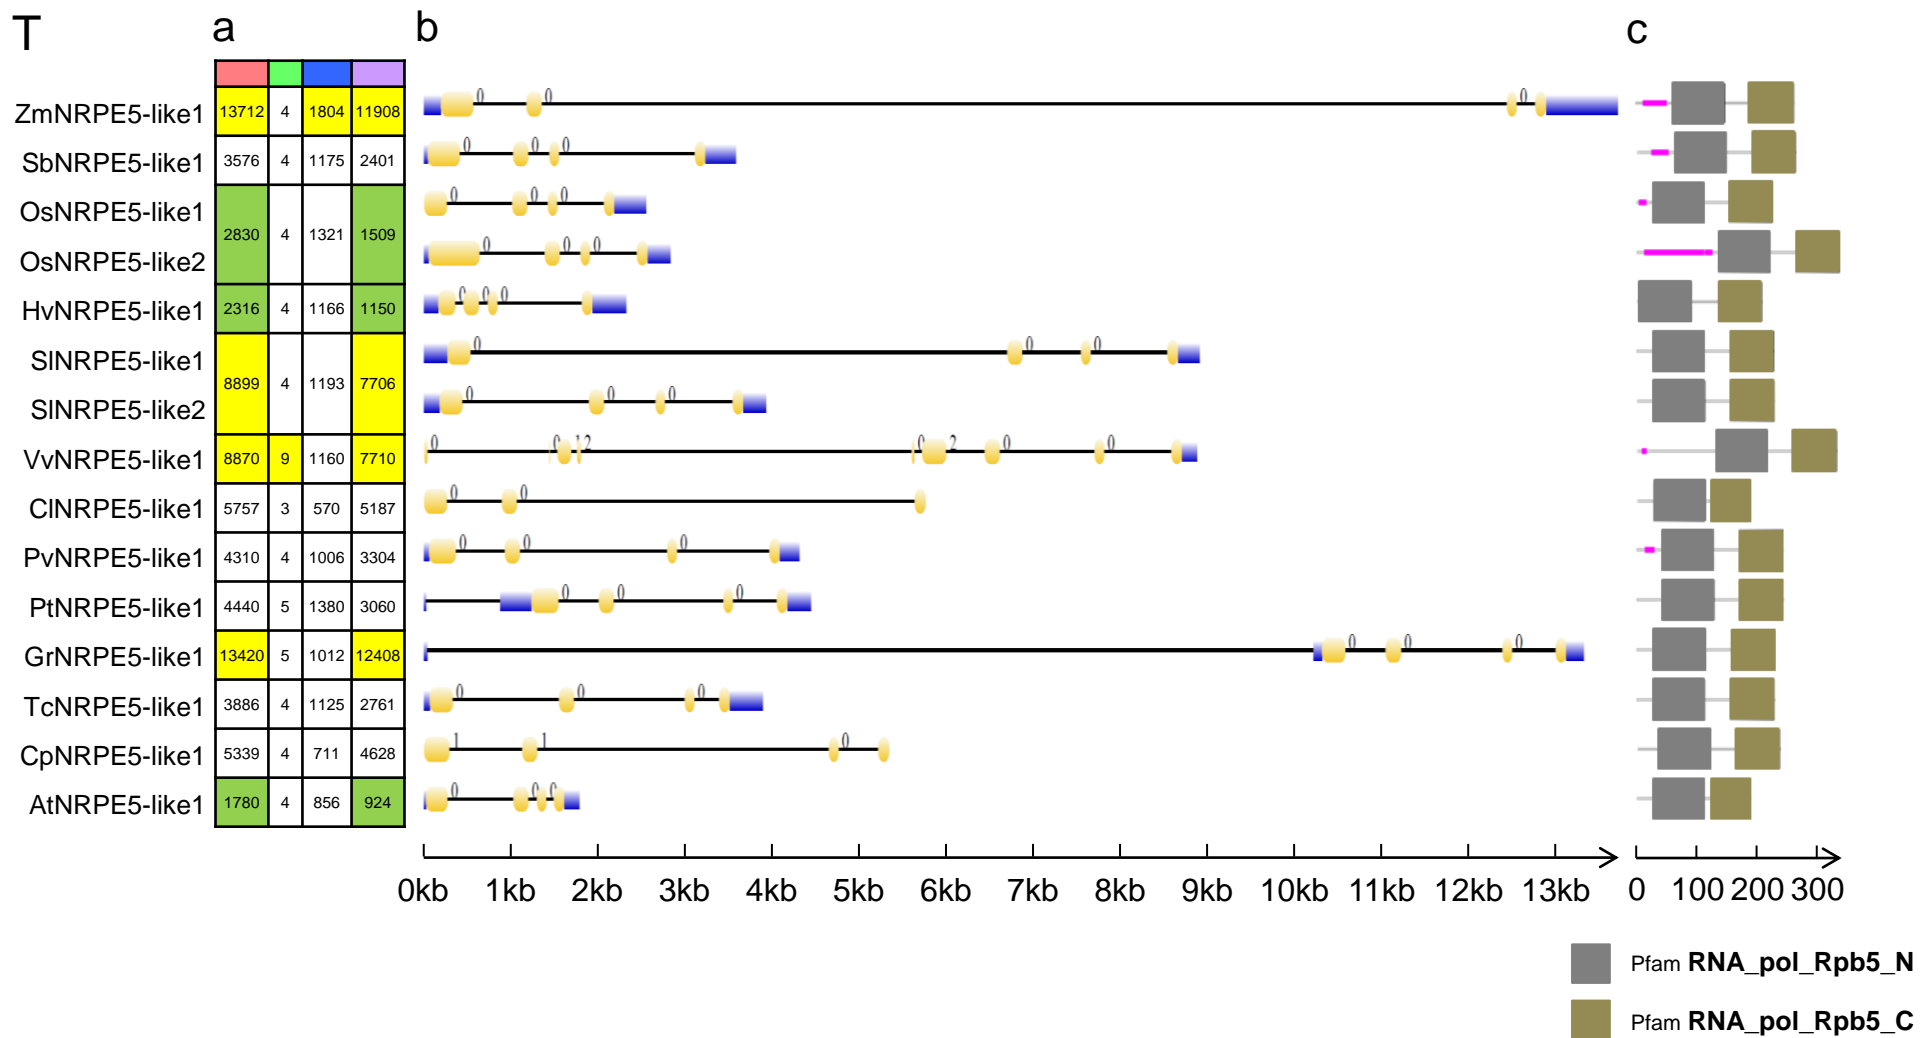

U

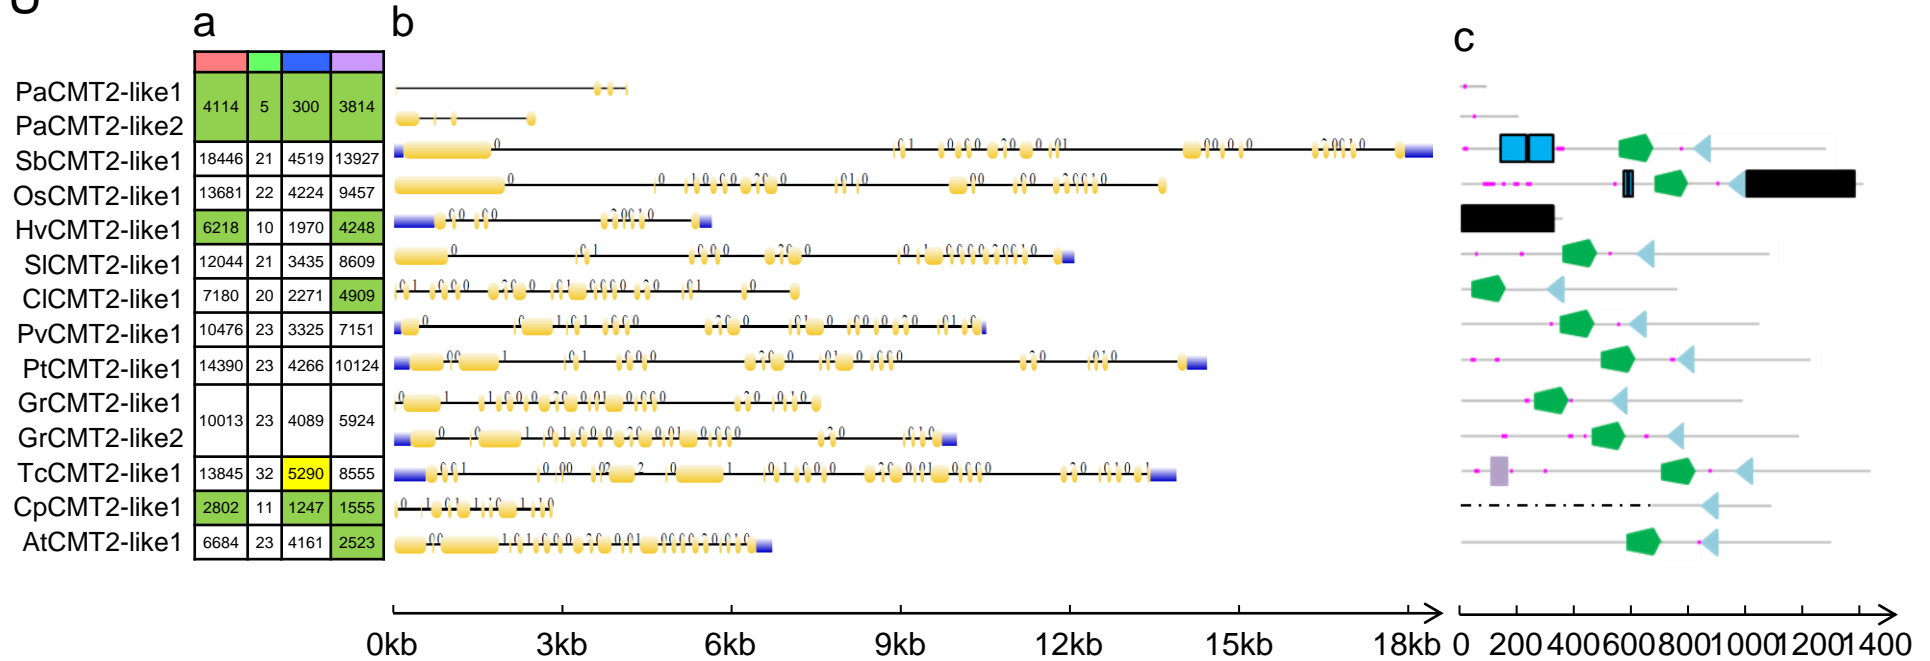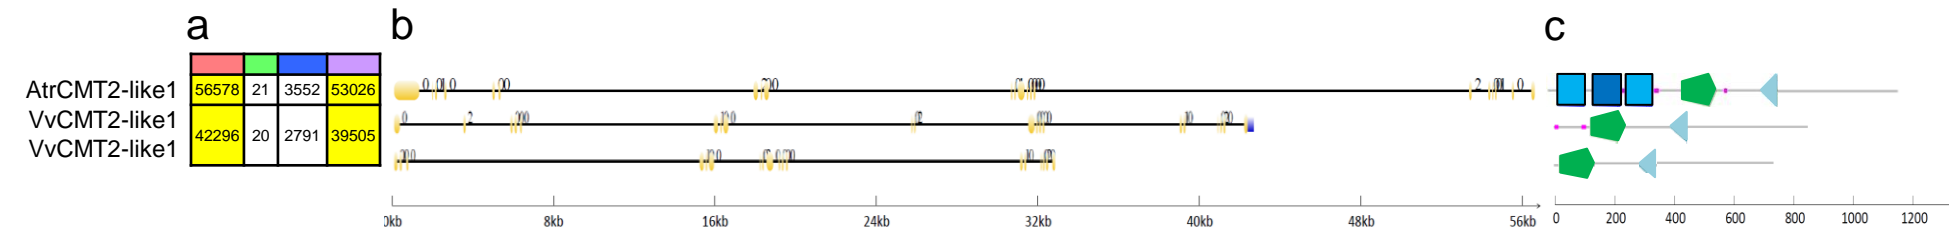

- ▮ SMART **BAH**
- ▮ SMART **CHROMO**
- ▮ Pfam **RNA\_methylase**
- ▮ Pfam **Ribosomal\_L35p**
- ▮ Prospero **RPT1**

V

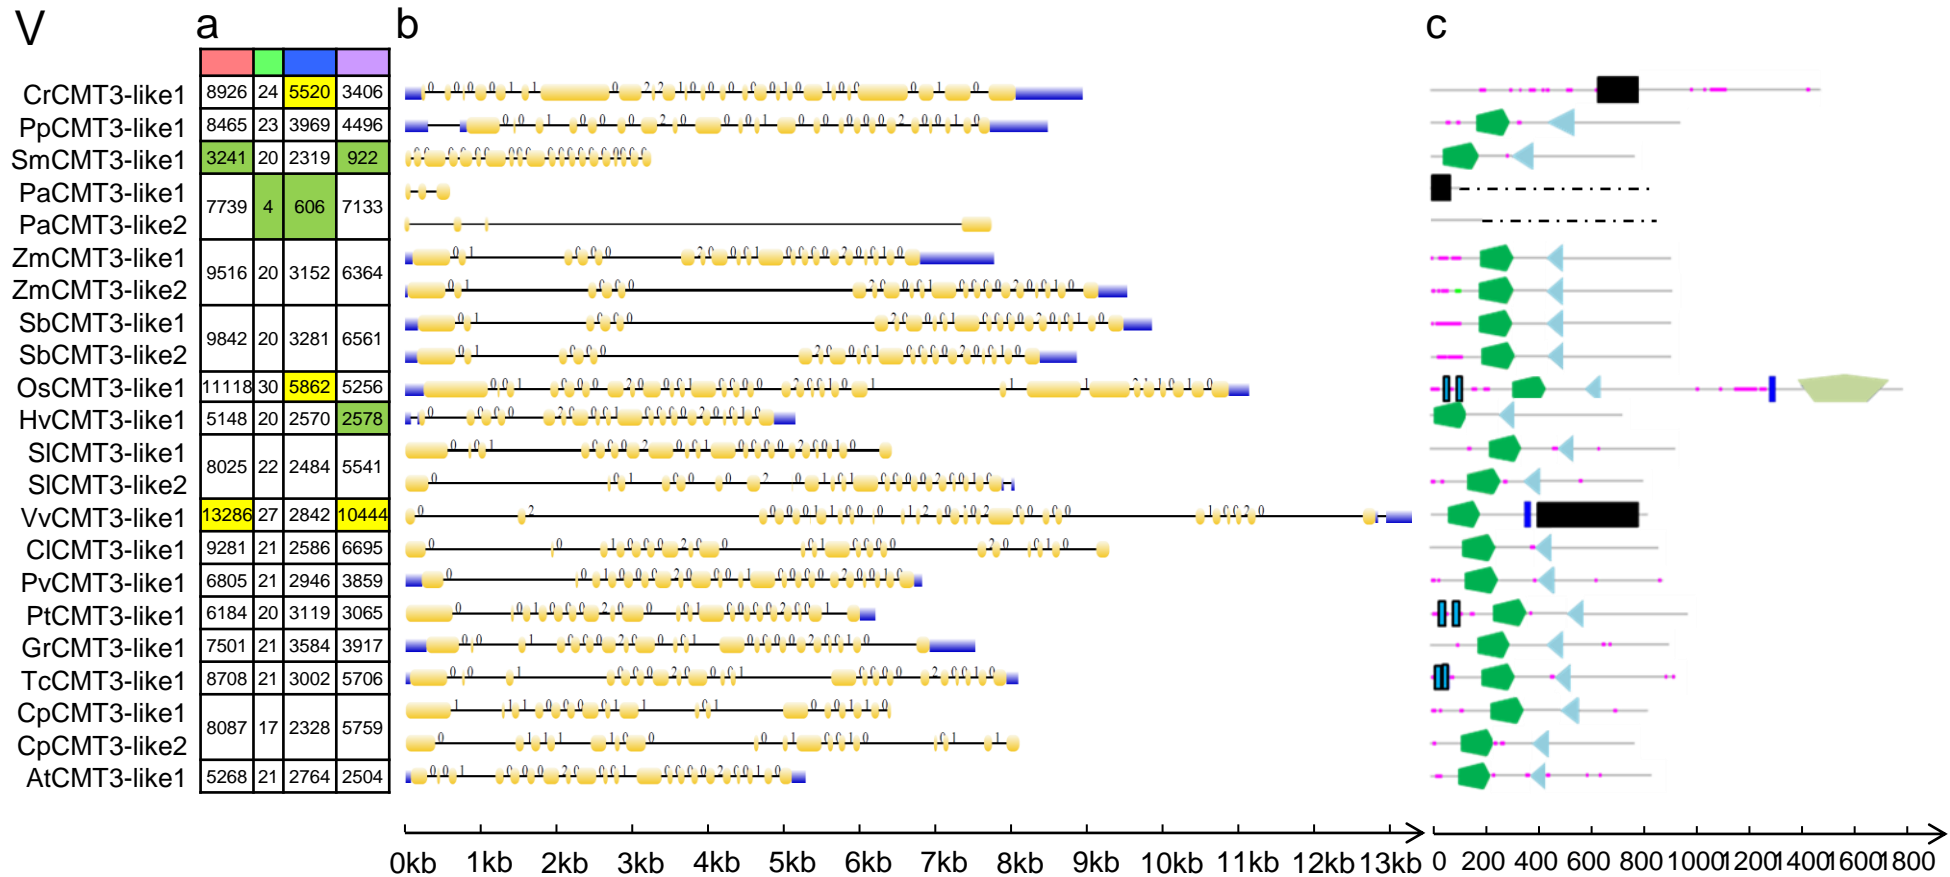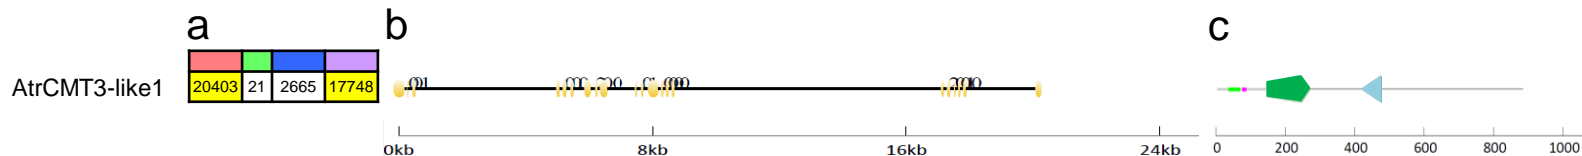

**c**

- SMART **BAH**
- SMART **CHROMO**
- Pfam **RNA\_methylase**
- SMART **S\_TKc**
- Prospero **RPT1**
- Prospero **RPT2**

W

a

b

|               |       |    |      |       |
|---------------|-------|----|------|-------|
| CrDDM1-like1  | 22621 | 34 | 6342 | 16279 |
| PpDDM1-like1  | 7153  | 17 | 3652 | 3501  |
| SmDDM1-like1  | 2688  | 12 | 2055 | 633   |
| PaDDM1-like1  | 13905 | 16 | 2415 | 11490 |
| PaDDM1-like2  | 17482 | 15 | 2301 | 15181 |
| AtrDDM1-like1 | 6719  | 15 | 3584 | 3135  |
| ZmDDM1-like1  | 6719  | 15 | 3584 | 3135  |
| ZmDDM1-like2  | 6731  | 15 | 3187 | 3544  |
| SbDDM1-like1  | 6731  | 15 | 3187 | 3544  |
| SbDDM1-like2  | 6307  | 14 | 3121 | 3186  |
| OsDDM1-like1  | 6307  | 14 | 3121 | 3186  |
| OsDDM1-like2  | 6791  | 13 | 2634 | 4157  |
| HvDDM1-like1  | 10457 | 15 | 2547 | 7910  |
| SIDD1-like1   | 7510  | 17 | 2403 | 5107  |
| SIDD1-like2   | 7173  | 15 | 2229 | 4944  |
| VvDDM1-like1  | 6013  | 16 | 2809 | 3204  |
| CIDD1-like1   | 6013  | 16 | 2809 | 3204  |
| PvDDM1-like1  | 7347  | 16 | 2859 | 4488  |
| PtDDM1-like1  | 7347  | 16 | 2859 | 4488  |
| PtDDM1-like2  | 4966  | 15 | 2247 | 2719  |
| GrDDM1-like1  | 4966  | 15 | 2247 | 2719  |
| TcDDM1-like1  | 6062  | 16 | 3302 | 2760  |
| CpDDM1-like1  | 5378  | 15 | 2373 | 3005  |
| AtDDM1-like1  | 4123  | 16 | 2598 | 1525  |

0kb 2kb 4kb 6kb 8kb 10kb 12kb 14kb 16kb 18kb 20kb 22kb

c

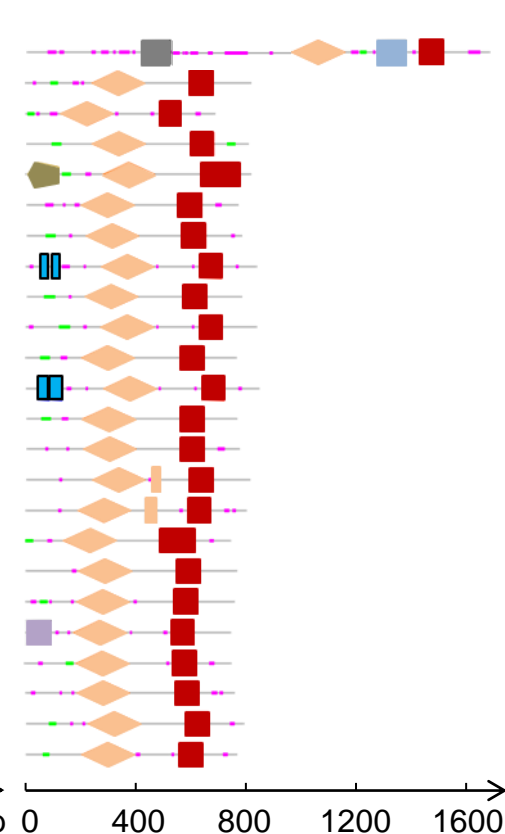

- ◆ SMART **DEXDc**
- BLAST **DEXDc**
- SMART **HELICc**
- Pfam **Nol1\_Nop2\_Fmu**
- Pfam **SNF2\_N**
- Pfam **DBINO**
- ▤ SMART **cNMP**
- Prospero **RPT1**

X

a

b

|                |       |    |       |
|----------------|-------|----|-------|
| CrJMJ14-like1  |       |    |       |
| CrJMJ14-like2  | 16761 | 22 | 12472 |
| PpJMJ14-like1  | 9456  | 12 | 6573  |
| PpJMJ14-like2  |       |    | 2883  |
| SmJMJ14-like1  | 2869  | 9  | 2403  |
| PaJMJ14-like1  |       |    | 466   |
| PaJMJ14-like2  | 15730 | 10 | 3786  |
| AtrJMJ14-like1 |       |    | 11944 |
| AtrJMJ14-like2 | 7920  | 11 | 3573  |
| OsJMJ14-like1  |       |    | 4347  |
| HvJMJ14-like1  | 5799  | 11 | 3422  |
| SlJMJ14-like1  | 7850  | 12 | 4590  |
| VvJMJ14-like1  | 7968  | 11 | 2958  |
| CtJMJ14-like1  | 10762 | 16 | 3619  |
| PvJMJ14-like1  | 7310  | 11 | 3219  |
| PtJMJ14-like1  | 6866  | 12 | 3751  |
| GrJMJ14-like1  | 6263  | 12 | 3213  |
| GrJMJ14-like2  |       |    | 3050  |
| TcJMJ14-like1  | 7488  | 11 | 3855  |
| TcJMJ14-like2  |       |    | 3633  |
| TcJMJ14-like3  | 11114 | 13 | 4842  |
| CpJMJ14-like1  |       |    | 6272  |
| AtJMJ14-like1  | 4187  | 7  | 2295  |
|                | 5195  | 12 | 3319  |
|                |       |    | 1892  |
|                |       |    | 1876  |

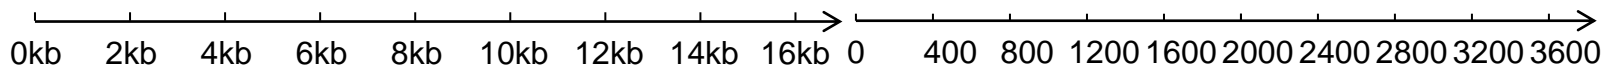

c

- SMART **JmiN**
- SMART **BRIGHT**
- SMART **PHD**
- SMART **JmiC**
- Pfam **zf-C5HC2**
- SMART **FYRN**
- Pfam **FYRN**
- SMART **FYRC**
- Pfam **PLU-1**
- Prospero **RPT4**
- Prospero **RPT5**



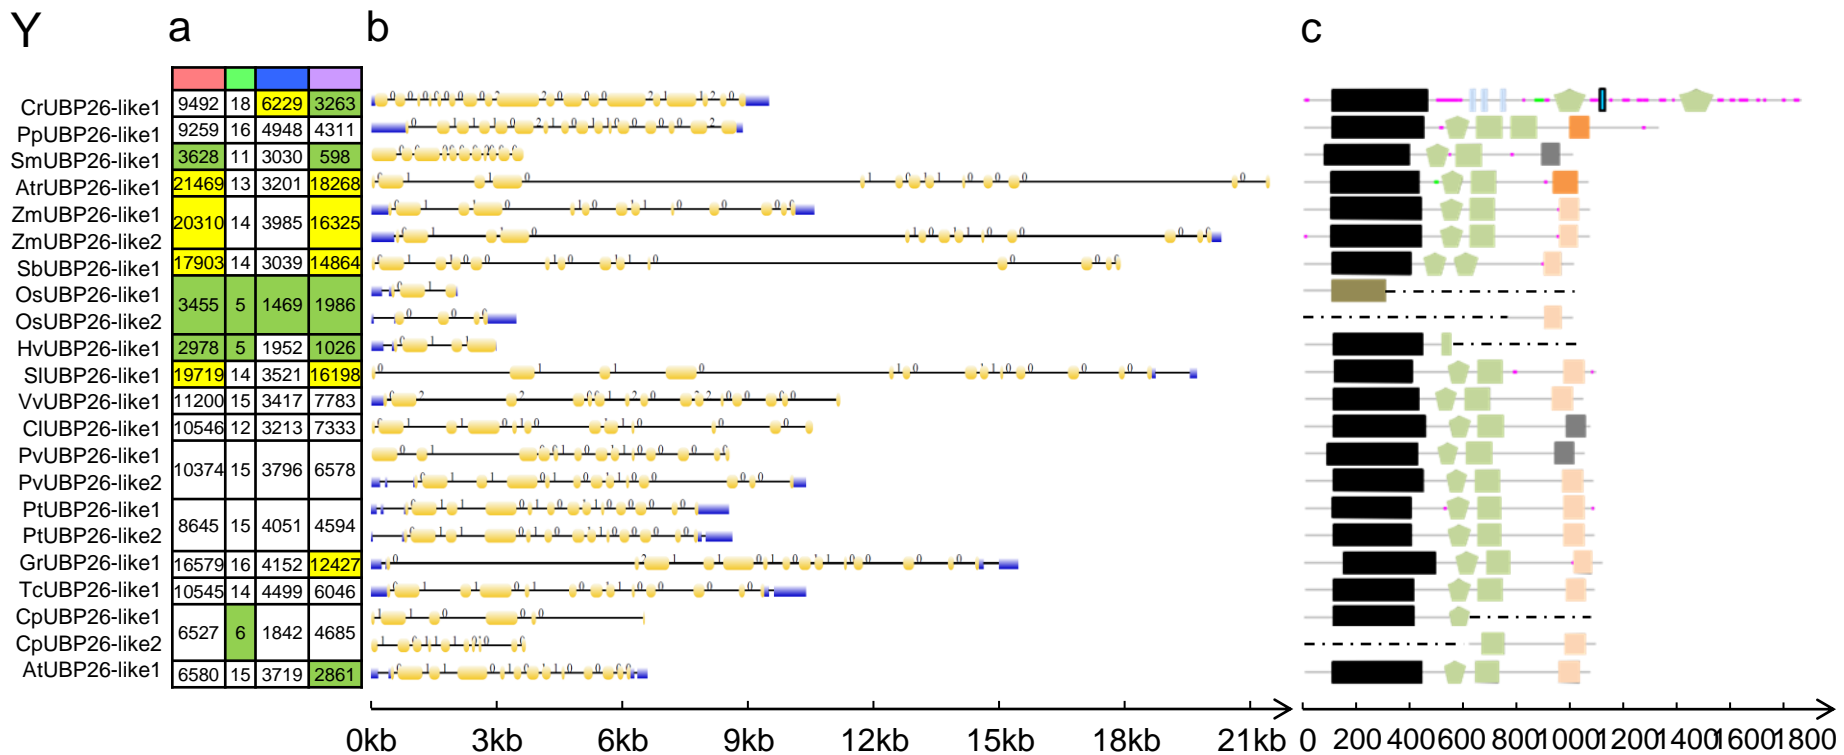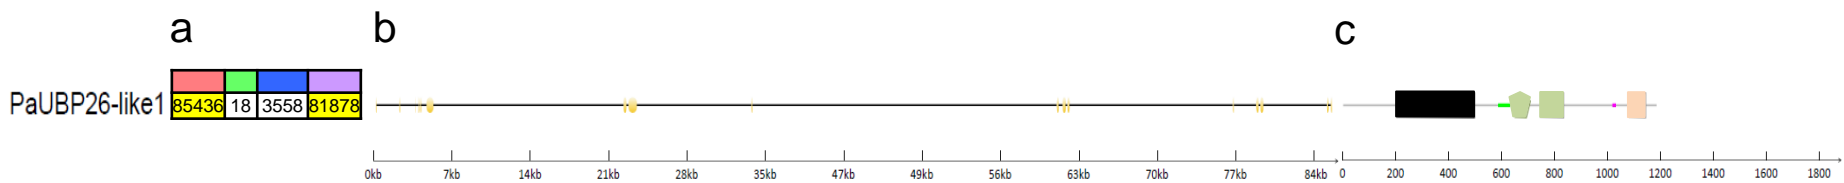

- Pfam **UCH**
- SMART **UIM**
- SMART **DUSP**
- BLAST **DUSP**
- SMART **UBQ**
- BLAST **UBQ**
- Pfam **ubiquitin**
- Pfam **UCH\_1**
- Prospero **RPT1**

Z

a

b

c

|               |       |    |      |       |
|---------------|-------|----|------|-------|
| CrHDA6-like1  | 10336 | 20 | 4252 | 6084  |
| PpHDA6-like1  | 5758  | 8  | 3204 | 2554  |
| PpHDA6-like2  |       |    |      |       |
| SmHDA6-like1  | 1853  | 4  | 1467 | 386   |
| SmHDA6-like2  |       |    |      |       |
| AtrHDA6-like1 | 26910 | 7  | 1479 | 25431 |
| AtrHDA6-like2 |       |    |      |       |
| ZmHDA6-like1  | 5601  | 6  | 1892 | 3709  |
| SbHDA6-like1  | 14483 | 6  | 1774 | 12709 |
| SbHDA6-like2  |       |    |      |       |
| OshDA6-like1  | 5014  | 6  | 1864 | 3150  |
| HvHDA6-like1  | 3888  | 6  | 1643 | 2245  |
| SIHDA6-like1  | 4505  | 6  | 1814 | 2691  |
| SIHDA6-like2  |       |    |      |       |
| VvHDA6-like1  | 16332 | 8  | 1896 | 14436 |
| CIHDA6-like1  | 5363  | 6  | 2901 | 2462  |
| PvHDA6-like1  | 5052  | 6  | 1813 | 3239  |
| PvHDA6-like2  |       |    |      |       |
| PtHDA6-like1  | 4278  | 6  | 2073 | 2205  |
| PtHDA6-like2  |       |    |      |       |
| GrHDA6-like1  | 4679  | 6  | 1918 | 2761  |
| TcHDA6-like1  | 3763  | 7  | 2027 | 1736  |
| CpHDA6-like1  | 3654  | 8  | 1329 | 2325  |
| AtHDA6-like1  | 2724  | 6  | 1746 | 978   |

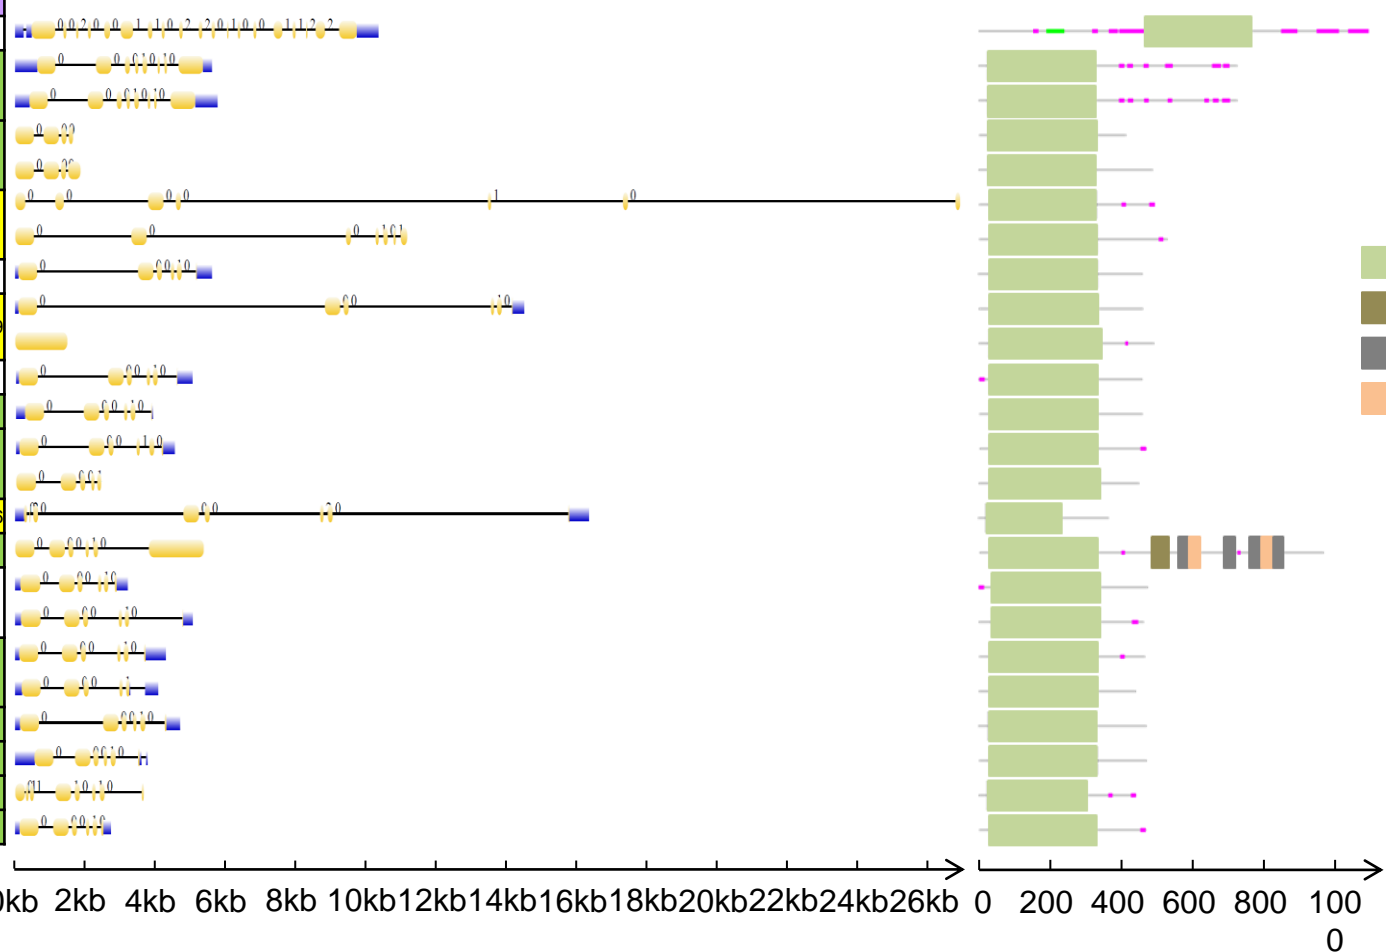

a

b

c

|              |       |   |      |       |
|--------------|-------|---|------|-------|
| PaHDA6-like1 |       |   |      |       |
| PaHDA6-like2 | 46623 | 7 | 1320 | 45303 |
| PaHDA6-like3 |       |   |      |       |

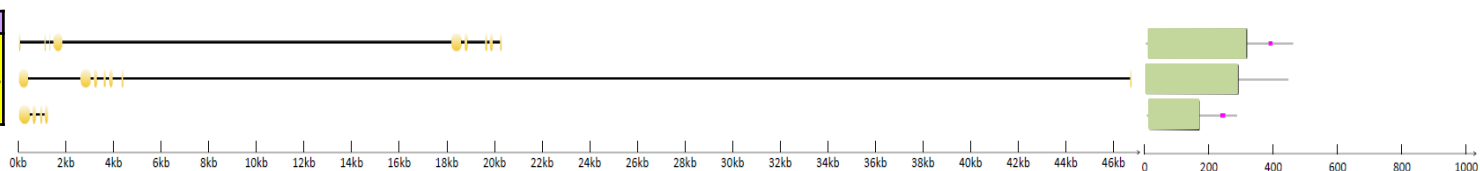

AA

a

b

c

|               |       |    |      |       |
|---------------|-------|----|------|-------|
| CrSUVH4-like1 | 8620  | 13 | 6391 | 2229  |
| PpSUVH4-like1 | 6691  | 14 | 3197 | 3494  |
| PpSUVH4-like2 |       |    |      |       |
| SmSUVH4-like1 | 2002  | 11 | 1476 | 526   |
| SmSUVH4-like2 |       |    |      |       |
| PaSUVH4-like1 |       |    |      |       |
| PaSUVH4-like2 | 27423 | 7  | 624  | 26799 |
| PaSUVH4-like3 |       |    |      |       |
| ZmSUVH4-like1 | 14687 | 16 | 2539 | 12148 |
| ZmSUVH4-like2 |       |    |      |       |
| SbSUVH4-like1 | 15778 | 15 | 2664 | 13114 |
| SbSUVH4-like2 |       |    |      |       |
| OsSUVH4-like1 | 10209 | 15 | 2408 | 7801  |
| HvSUVH4-like1 | 7856  | 16 | 2543 | 5313  |
| SISUVH4-like1 | 18697 | 15 | 2460 | 16237 |
| CISUVH4-like1 | 3024  | 1  | 3024 | 0     |
| PvSUVH4-like1 | 3181  | 2  | 2557 | 624   |
| PtSUVH4-like1 |       |    |      |       |
| PtSUVH4-like2 |       |    |      |       |
| PtSUVH4-like3 | 17875 | 15 | 2501 | 15374 |
| PtSUVH4-like4 |       |    |      |       |
| GrSUVH4-like1 | 10595 | 15 | 3315 | 7280  |
| GrSUVH4-like2 |       |    |      |       |
| TcSUVH4-like1 | 8431  | 16 | 3212 | 5219  |
| CpSUVH4-like1 | 2651  | 5  | 669  | 1982  |
| AtSUVH4-like1 | 4742  | 15 | 2212 | 2530  |

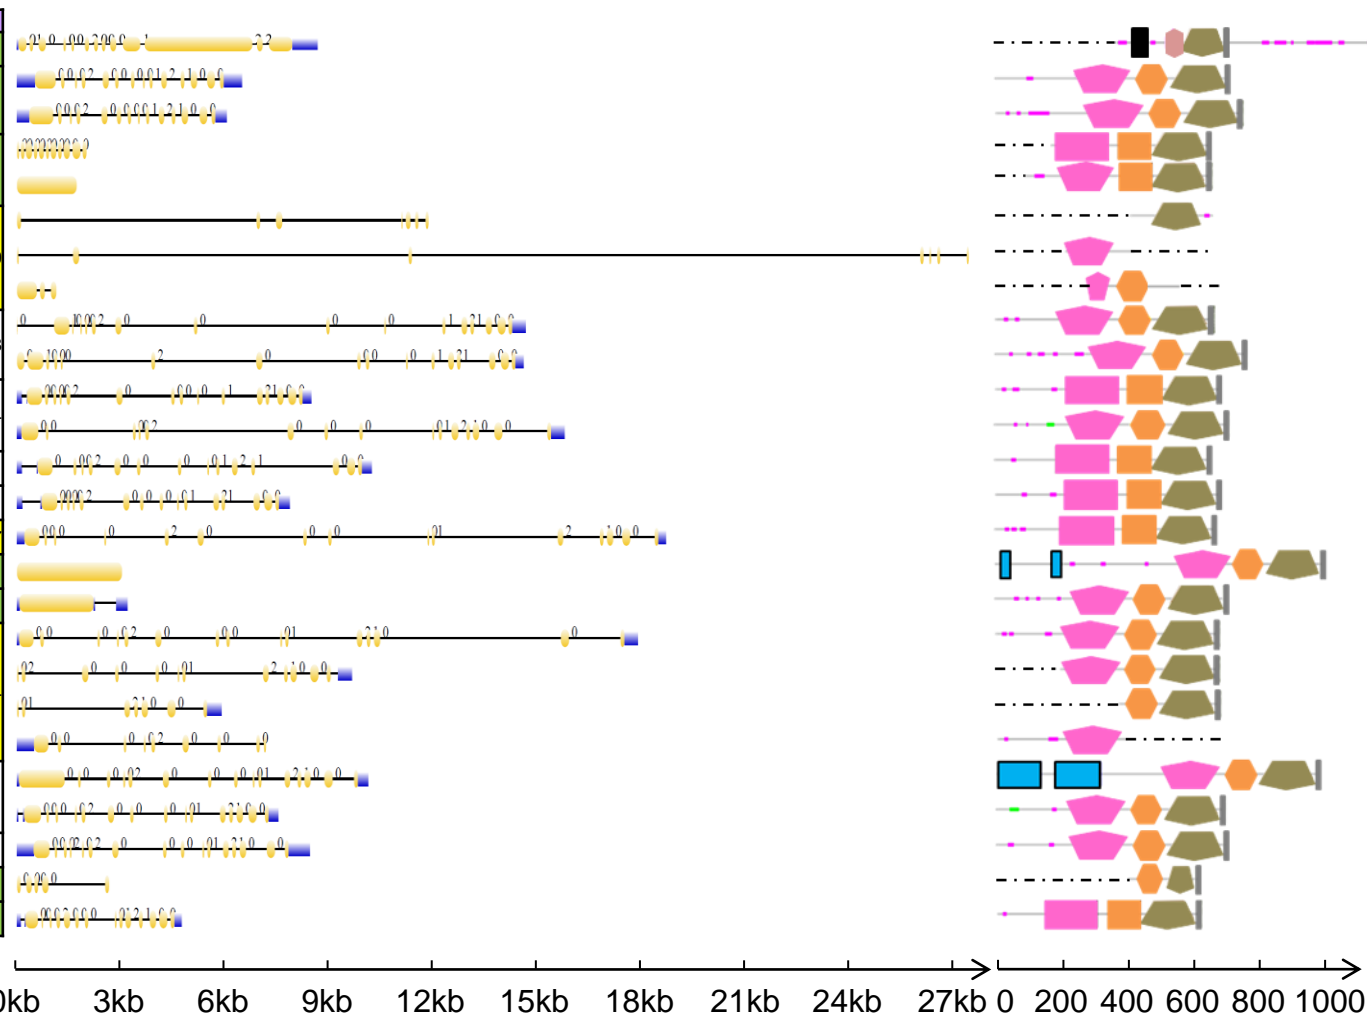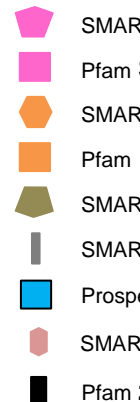

a

b

c

|                |       |    |      |       |
|----------------|-------|----|------|-------|
| AtrSUVH4-like1 | 45195 | 8  | 1431 | 43764 |
| AtrSUVH4-like2 |       |    |      |       |
| VvSUVH4-like1  | 45152 | 15 | 2549 | 42603 |
| VvSUVH4-like2  |       |    |      |       |

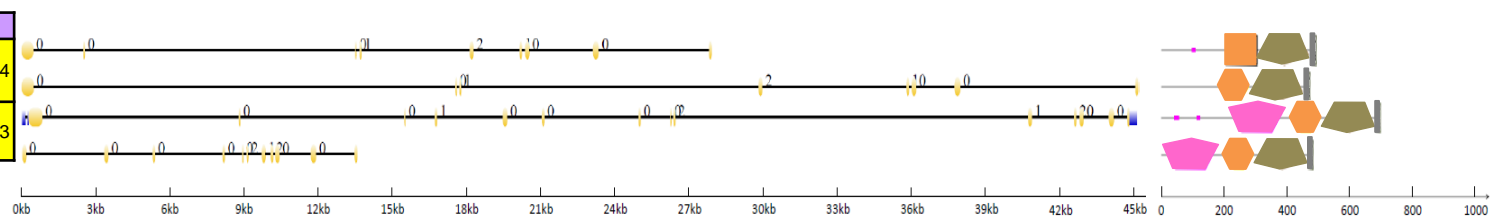

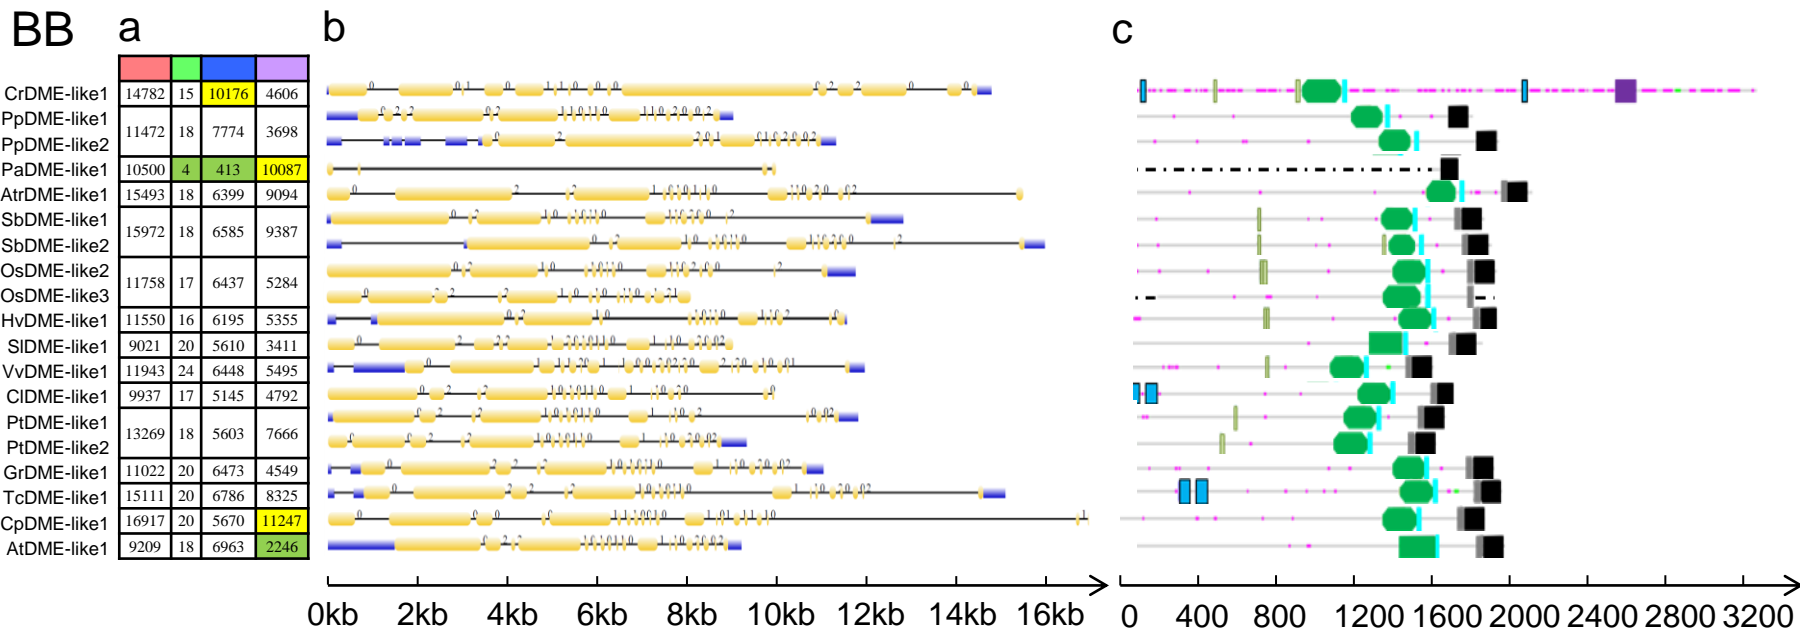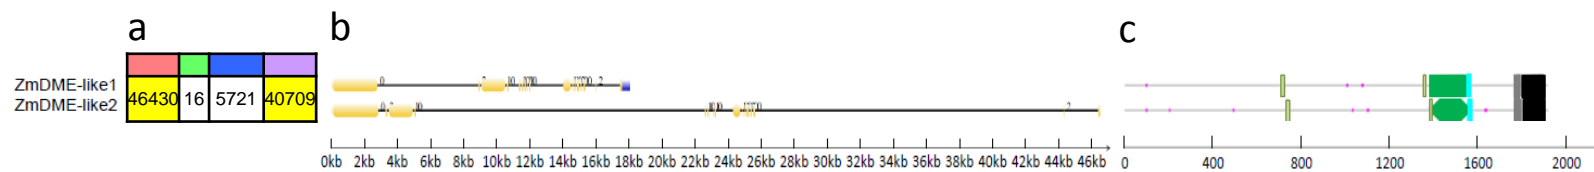

- SMART **AT\_hook**
- SMART **ENDO3c**
- BLAST **ENDO3c**
- Pfam **Perm-CXXC**
- Pfam **RRM\_DME**
- SMART **FES**
- SMART **DnaJ**
- Prospero **RPT1**

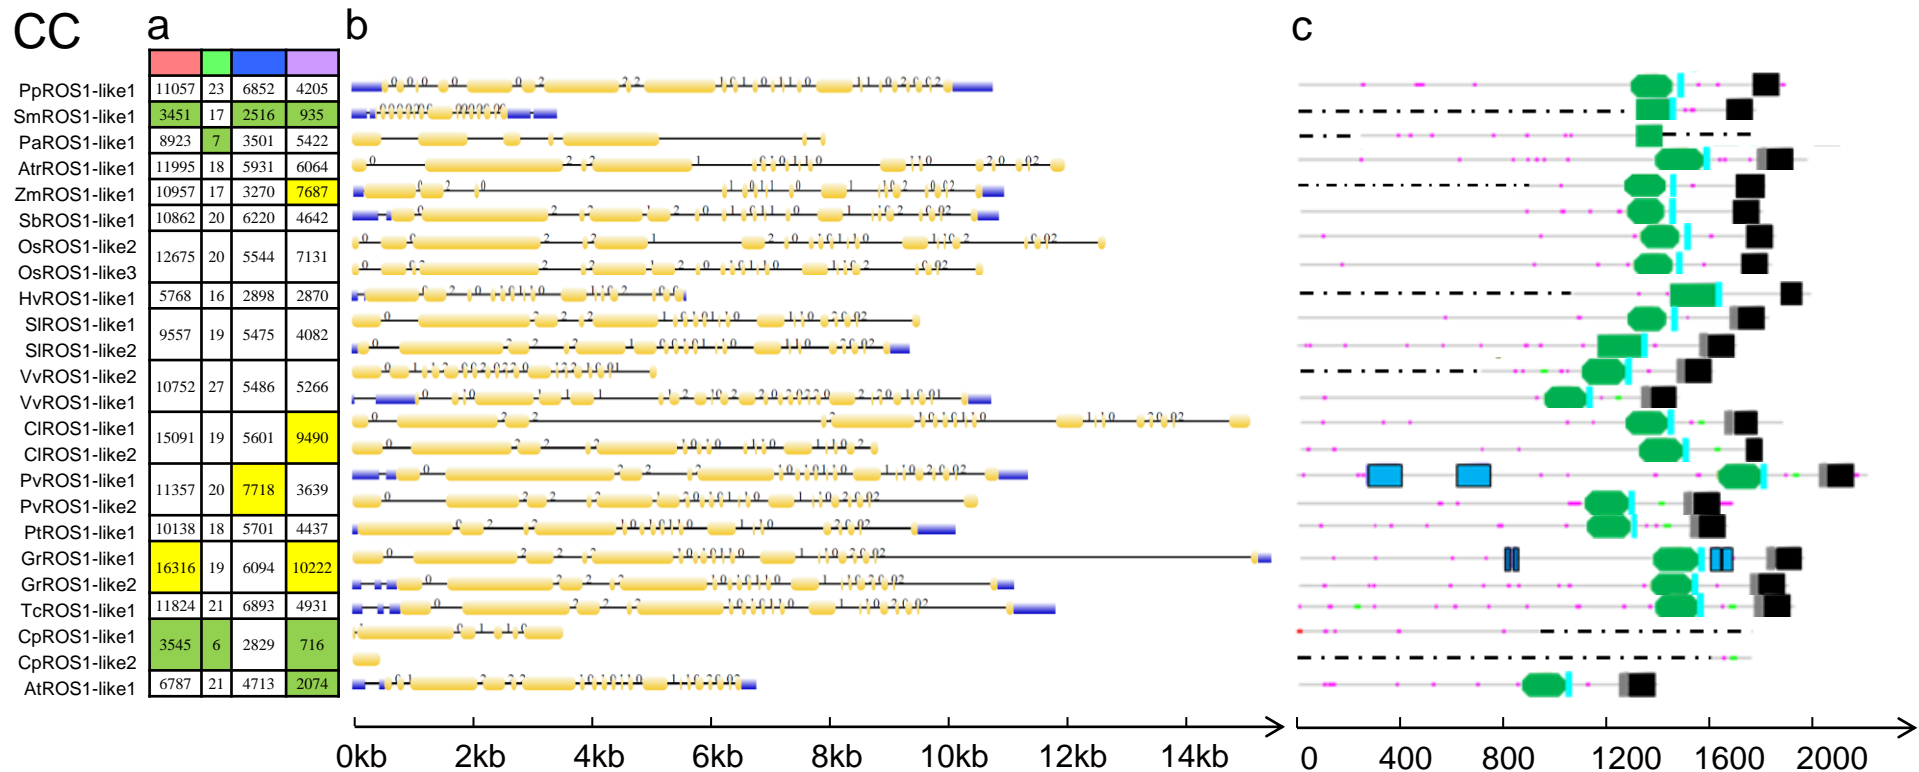

- SMART AT\_hook
- SMART ENDO3c
- BLAST ENDO3c
- Pfam Perm-CXXC
- Pfam RRM\_DME
- SMART FES
- Prospero RPT1
- Prospero RPT2

DD

a

b

c

|              |       |    |      |       |
|--------------|-------|----|------|-------|
|              |       |    |      |       |
| SbDML3-like3 | 9303  | 17 | 3761 | 5542  |
| SbDML3-like2 |       |    |      |       |
| OsDML3-like1 | 8806  | 17 | 3992 | 4814  |
| OsDML3-like1 |       |    |      |       |
| HvDML3-like2 | 5776  | 13 | 1994 | 3782  |
| SIDML3-like2 | 10224 | 22 | 4778 | 5446  |
| PvDML3-like1 | 8180  | 17 | 2646 | 35534 |
| GrDML3-like2 | 7861  | 19 | 5286 | 2575  |
| TcDML3-like2 | 3795  | 11 | 2197 | 1598  |
| AtDML3-like1 | 5424  | 20 | 3308 | 2116  |

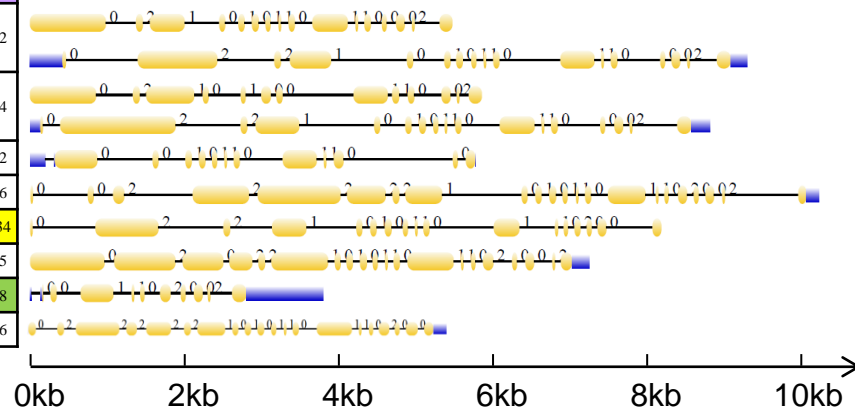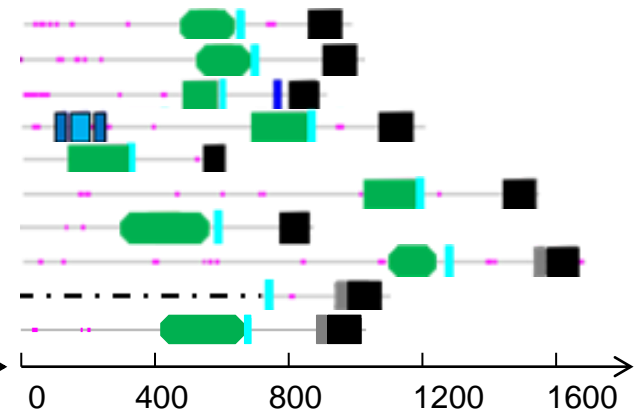

- SMART AT\_hook
- SMART ENDO3c
- BLAST ENDO3c
- Pfam Perm-CXXC
- Pfam RRM\_DME
- SMART FES
- Prospero RPT1
- Prospero RPT2
