# Supplementary material for: Tracing the origin and evolution history of methylation-related genes in plants
Source: PubMed Central journal article supplement (PMC6624907; doi:10.1186/s12870-019-1923-7), 2019-07-12
Supplement: 12870_2019_1923_MOESM3_ESM.pdf [file 12870_2019_1923_MOESM3_ESM.pdf]

**A**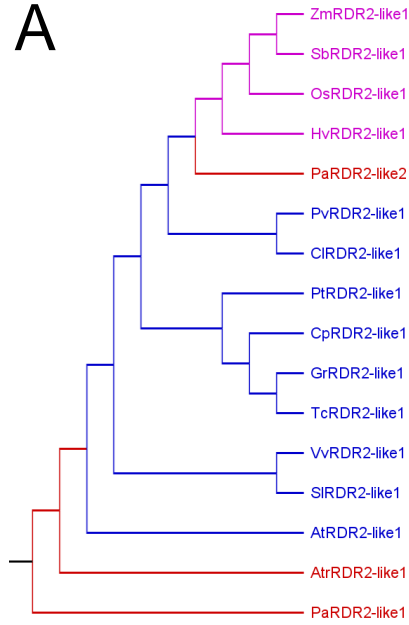**B**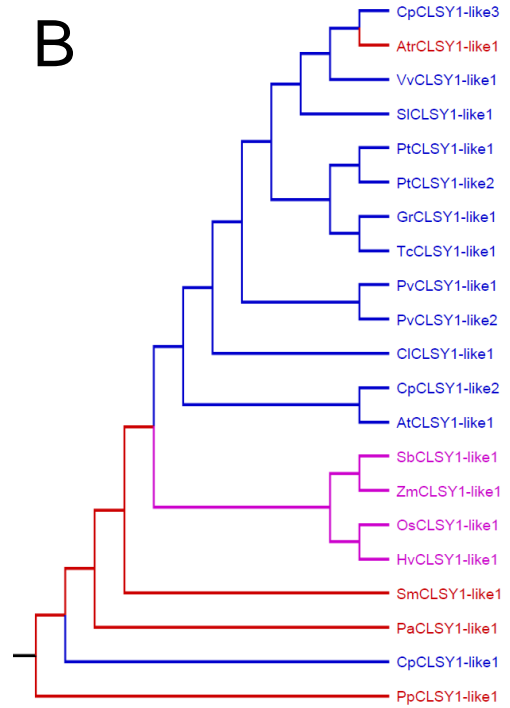**C**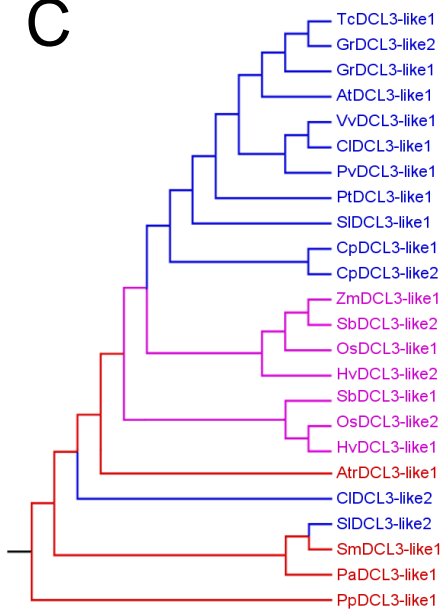**D**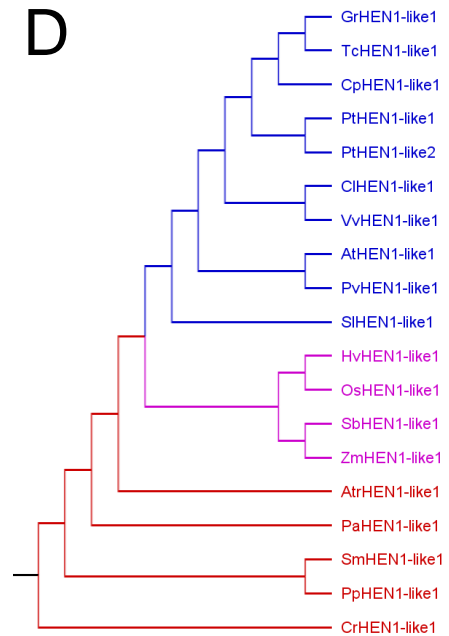

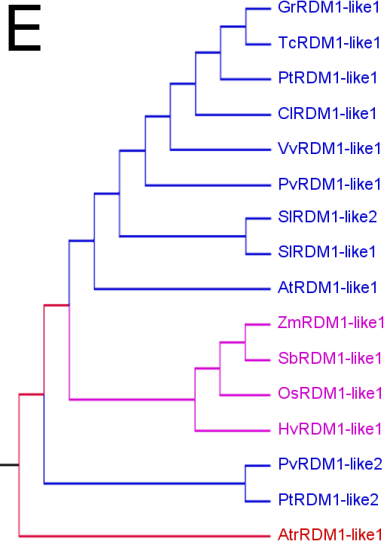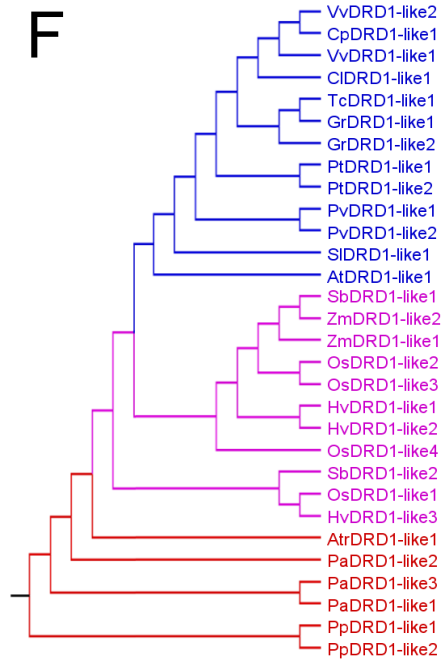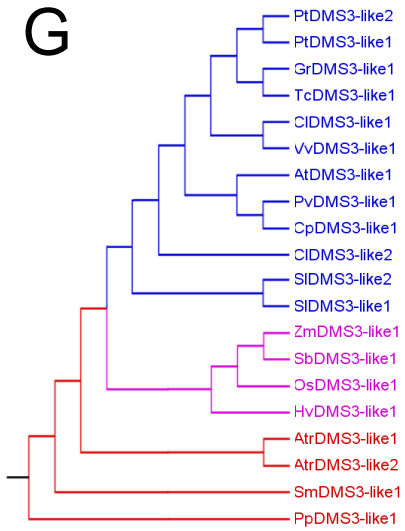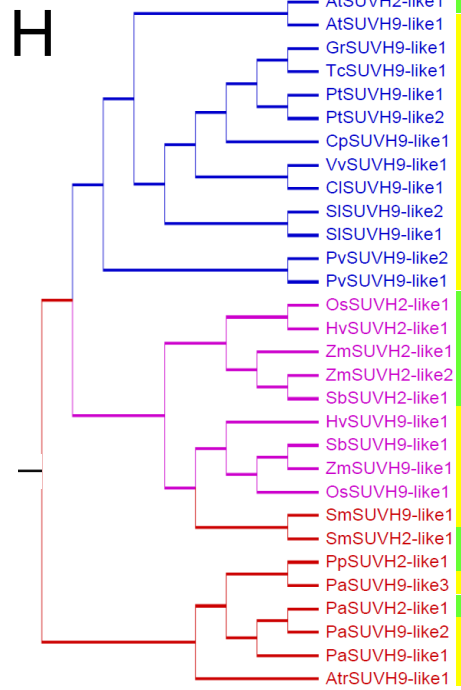

**I**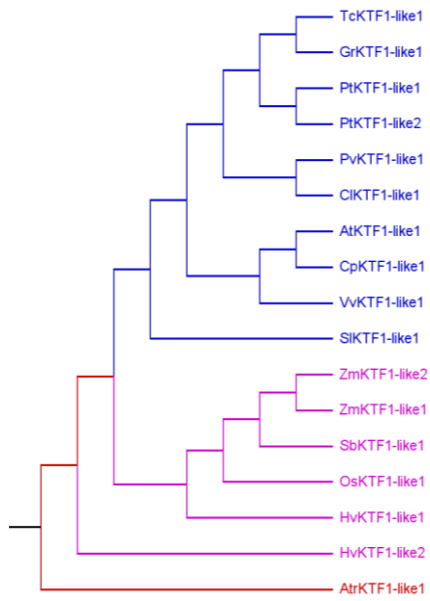**J**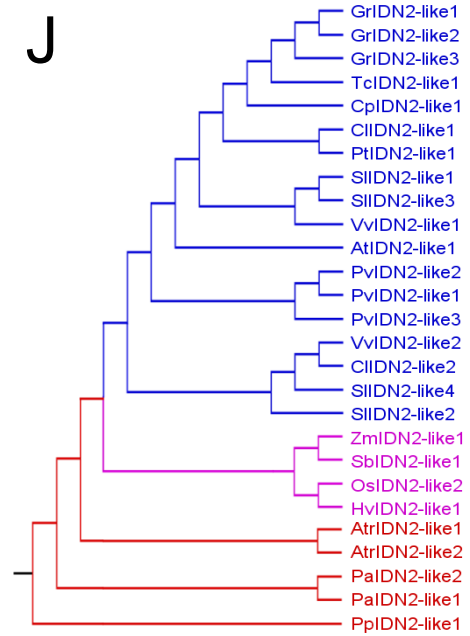**K**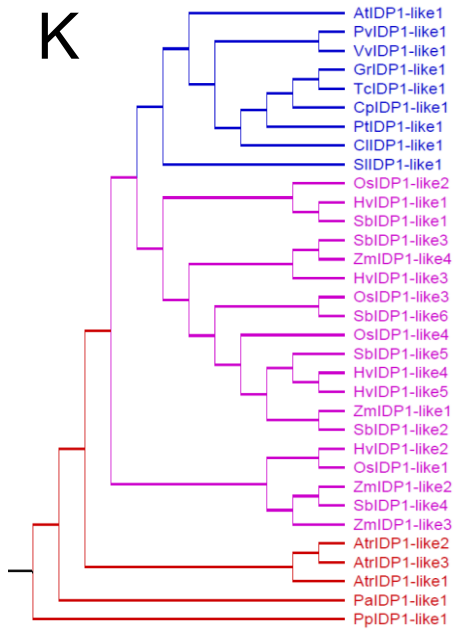

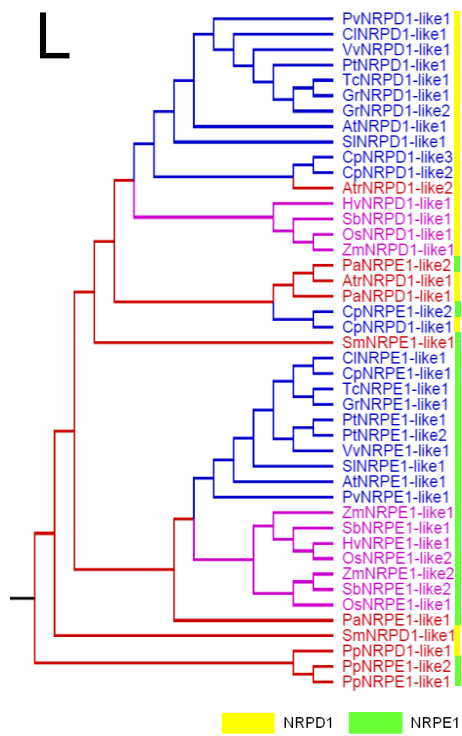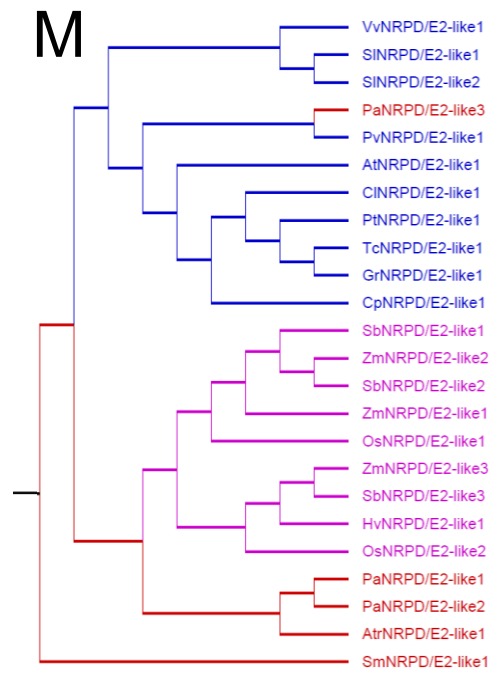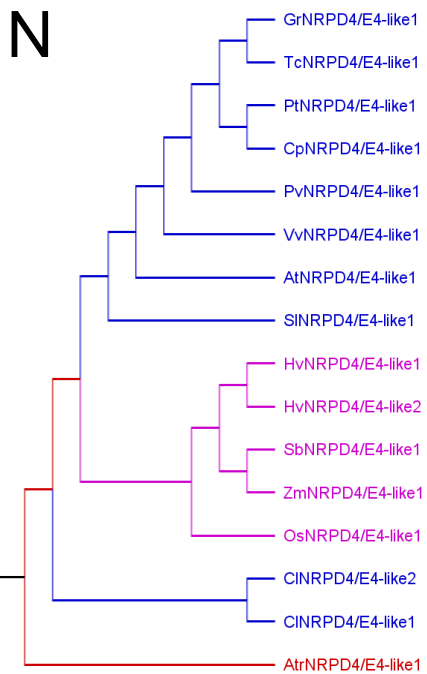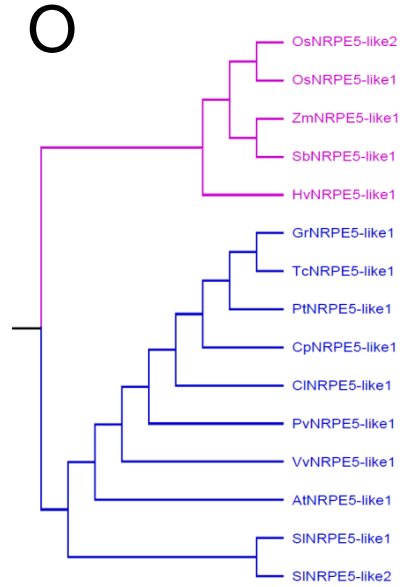

**P**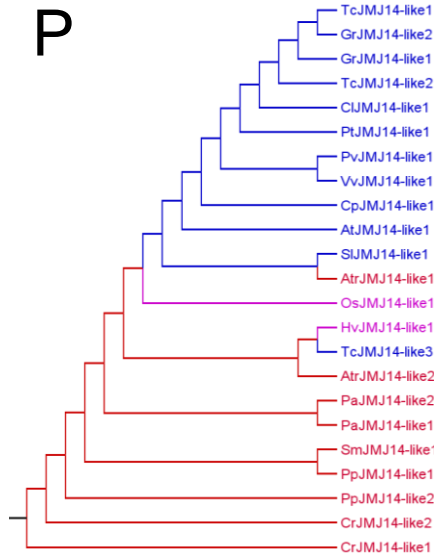**Q**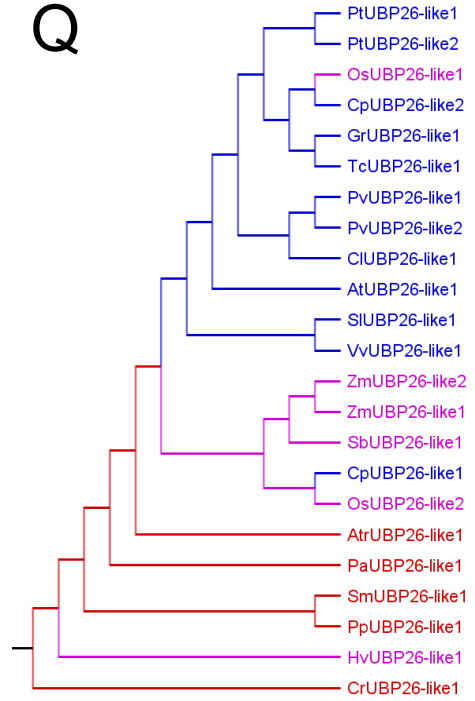**R**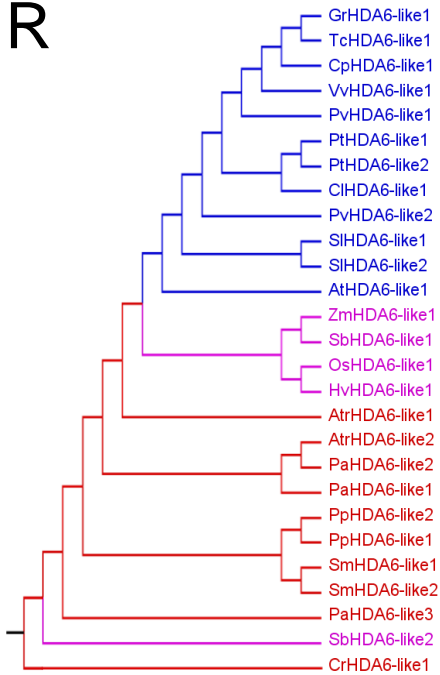**S**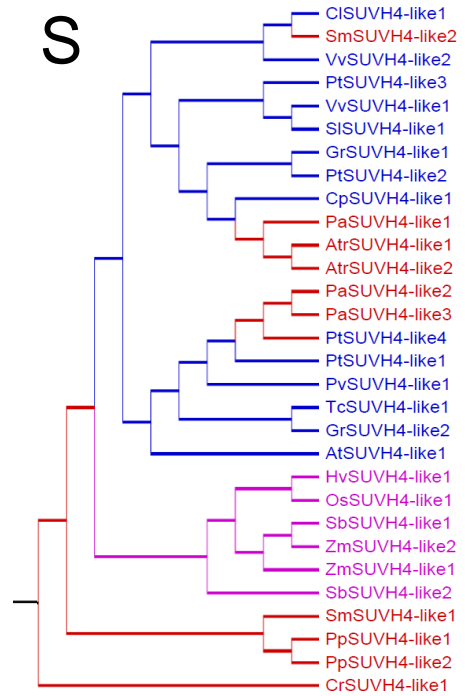

T

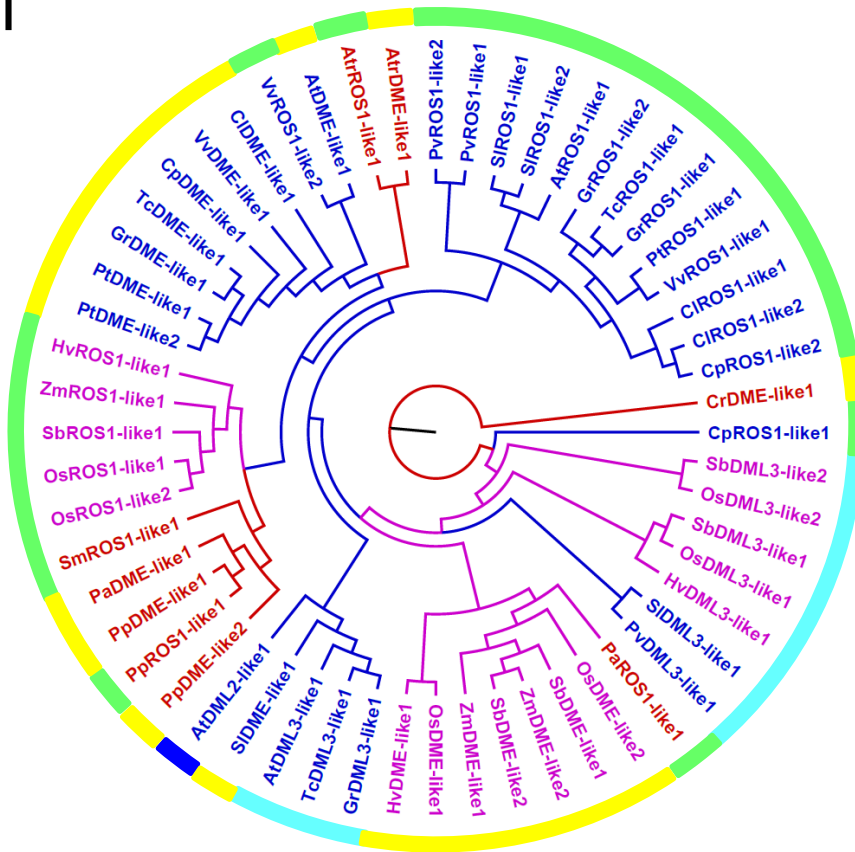

┌ early plants 
 ┌ monocots 
 ┌ dicots

DME 
  ROS1 
  DML2 
  DML3
